# Supplementary material for: Gold(i) and platinum(ii) switch: a post-Ugi intramolecular hydroarylation to pyrrolopyridinones and pyrroloazepinones
Source: Royal Society of Chemistry journal article supplement (doi:10.1039/c2cc35900f), 2012-01-01

## SUPPORTING INFORMATION

# Gold(I) and Platinum(II) switch: A post-Ugi intramolecular hydroarylation to pyrrolopyridinones and pyrroloazepinones

Sachin G. Modha,<sup>a,b</sup> Amit Kumar,<sup>a,c</sup> Dipak D. Vachhani,<sup>a</sup> Sunil K. Sharma,<sup>c</sup> Virinder S. Parmar,<sup>c</sup> and Erik V. Van der Eycken\*<sup>a</sup>

<sup>a</sup> Laboratory for Organic & Microwave-Assisted Chemistry (LOMAC), Department of Chemistry, KU Leuven, Celestijnenlaan 200F, B-3001, Leuven, Belgium.

<sup>b</sup> Present address: "Mani Bhuvan", Nr. Lohana Mahajan Vadi, Chhaya-360 578, Porbandar, Gujarat, India.

<sup>c</sup> Bioorganic Laboratory, Department of Chemistry, University of Delhi, Delhi- 110 007, India.

Corresponding author: [erik.vandereycken@chem.kuleuven.be](mailto:erik.vandereycken@chem.kuleuven.be)

### Table of Contents

|                                                                                     |       |
|-------------------------------------------------------------------------------------|-------|
| This page .....                                                                     | 1     |
| General experimental procedures .....                                               | 2     |
| General procedure of Ugi reaction .....                                             | 3-5   |
| Optimization of the intramolecular hydroarylation .....                             | 6     |
| General procedure and data for Au(PPh <sub>3</sub> )OTf catalyzed cyclization ..... | 7-11  |
| General procedure and data for PtCl <sub>2</sub> catalyzed cyclization .....        | 12-15 |
| Copies of <sup>1</sup> H, <sup>13</sup> C and NOESY NMR spectra .....               | 16-33 |

## General Experimental Methods

NMR spectra were recorded on a 400 MHz & 300 MHz instrument using CDCl<sub>3</sub> and DMSO-d<sub>6</sub> as solvent, stated accordingly. The <sup>1</sup>H and <sup>13</sup>C chemical shifts are reported in parts per million relative to tetramethylsilane as an internal standard. For the Mass spectrometry, ion source temperature was 150-250 °C, as required. High-resolution EI-mass spectra were performed with a resolution of 10,000. For chromatography, analytical TLC plates and 70-230 mesh silica gel were used. All the solvents and chemicals were purchased and used as available. All the reactions at rt and heating were carried out in a screw capped vial under air.

Table 1. Starting materials

| Aldehyde                                                                                                                                                                                                                                                                         | Amine                                                                                           | 2-alkynoic acid                                                                                                            | Isonitrile                                                     |
|----------------------------------------------------------------------------------------------------------------------------------------------------------------------------------------------------------------------------------------------------------------------------------|-------------------------------------------------------------------------------------------------|----------------------------------------------------------------------------------------------------------------------------|----------------------------------------------------------------|
| <p>1a: 2-methyl-1H-imidazole-5-carbaldehyde<br/>1b: 2-(4-methylphenyl)-1H-imidazole-5-carbaldehyde<br/>1c: 2-(benzyl)imidazole-5-carbaldehyde<br/>1d: 2-(4-methyl-1H-imidazol-5-yl)thiophene-3-carbaldehyde<br/>1e: 2-(4-(methylsulfonyl)phenyl)-1H-imidazole-5-carbaldehyde</p> | <p>2a: 4-(benzylamino)anisole<br/>2b: 1,4-bis(2-aminopropyl)benzene<br/>2c: cyclohexylamine</p> | <p>3a: 2-ethynylacetic acid<br/>3b: 2-(prop-1-yn-1-yl)acetic acid<br/>3c: 2-(4-(benzylamino)phenoxy)ethynylacetic acid</p> | <p>4a: tert-butyl isocyanide<br/>4b: cyclohexyl isocyanide</p> |

## General procedure for synthesis of Ugi products **5a-i**

To a solution of 2-formylpyrrole **1a-e** (1.83 mmol, 1 equiv) in methanol (3 mL) were added successively Na<sub>2</sub>SO<sub>4</sub> (0.3g), amine **2a-c** (1.2 equiv), alkynoic acid **3a-c** (1.2 equiv) and isonitrile **4a-b** (1.2 equiv) in a screw capped vial equipped with a magnetic stir bar. The reaction mixture was stirred at 50 °C under air for 24-48 h in an oil bath. After completion of the reaction, the mixture was diluted with EtOAc (100 mL) and was extracted with water (50 mL). Organic layer was washed with brine (50 mL), dried over magnesium sulfate and evaporated under reduced pressure to obtain residue which was subjected to silica gel column chromatography (80% EtOAc in Heptane) to afford the desired product **5a-i** as solid.

Ugi products appear as mixture of two rotamers, so <sup>1</sup>H and <sup>13</sup>C NMR spectra are not very characteristic. Only representative data for one compound are given.

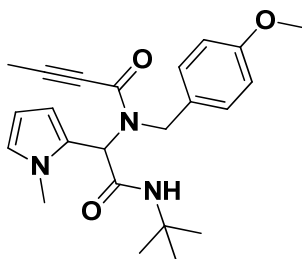

*N*-(2-(*tert*-butylamino)-1-(1-methyl-1*H*-pyrrol-2-yl)-2-oxoethyl)-*N*-(4-methoxybenzyl)but-2-ynamide (**5a**).

White solid, Yield 83% (mixture of rotamers ~ 1:3). Melting point: 192-194 °C.

<sup>1</sup>H NMR (300 MHz, CDCl<sub>3</sub>) δ 6.85 (d, *J* = 8.49Hz, 0.55H), 6.78 (d, *J* = 8.67Hz, 1.51H), 6.66 (m, 2H), 6.51 (m, 0.26H), 6.31 (m, 1.49H), 6.22 (bs, 0.24H), 6.12 (t, 0.25H), 6.02 (t, 0.74H), 5.95 (s, 0.75H), 5.88 (s, 0.26H), 5.53 (bs, 0.78H), 5.44 (bs, 0.25H), 5.01 (d, *J* = 15.84Hz, 0.75H), 4.47 (d, *J* = 15.84Hz, 0.76H), 4.37 (d, *J* = 7.53Hz, 0.44H), 3.75 (s, 3H), 3.15 (s, 0.75H), 3.01 (s, 2.27H), 2.01 (m, 3H), 1.33 (s, 6.69H), 1.27 (s, 2.40H).

<sup>13</sup>C NMR (75 MHz, CDCl<sub>3</sub>) δ 167.5, 167.3, 158.7, 158.4, 156.0, 155.6, 130.8, 130.1, 129.8, 129.1, 125.0, 123.7, 123.4, 113.4, 113.2, 111.5, 111.3, 107.5, 91.2, 90.4, 74.2, 73.3, 60.2, 55.2, 53.8, 51.7, 51.6, 49.8, 45.6, 33.3, 33.1, 28.5, 28.4, 4.1(2).

HRMS calculated for C<sub>23</sub>H<sub>29</sub>N<sub>3</sub>O<sub>3</sub> 395.2209, found 395.2207.

Table 2. Ugi products

| Structure                                                                           | Data                                                                                                                                                                                                                                                                                                                                                                             |
|-------------------------------------------------------------------------------------|----------------------------------------------------------------------------------------------------------------------------------------------------------------------------------------------------------------------------------------------------------------------------------------------------------------------------------------------------------------------------------|
| 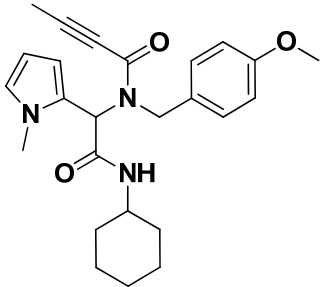   | <p><i>N</i>-(2-(cyclohexylamino)-1-(1-methyl-1<i>H</i>-pyrrol-2-yl)-2-oxoethyl)-<i>N</i>-(4-methoxybenzyl)but-2-ynamide (<b>5b</b>)</p> <p>White solid, Yield 72%, Melting point: 164-166 °C.<br/>                     HRMS calculated for C<sub>25</sub>H<sub>31</sub>N<sub>3</sub>O<sub>3</sub> 421.2365<br/>                     found 421.2354</p>                           |
|   | <p><i>N</i>-butyl-<i>N</i>-(2-(cyclohexylamino)-1-(1-methyl-1<i>H</i>-pyrrol-2-yl)-2-oxoethyl)but-2-ynamide (<b>5c</b>)</p> <p>White solid, Yield 87%, Melting point: 118-120 °C.<br/>                     HRMS calculated for C<sub>21</sub>H<sub>31</sub>N<sub>3</sub>O<sub>2</sub> 357.2416<br/>                     found 357.2418</p>                                       |
|  | <p><i>N</i>-(2-(<i>tert</i>-butylamino)-1-(1-methyl-1<i>H</i>-pyrrol-2-yl)-2-oxoethyl)-<i>N</i>-(4-methoxybenzyl)pent-2-ynamide (<b>5d</b>)</p> <p>White solid, Yield 69%, Melting point: 152-154 °C.<br/>                     HRMS calculated for C<sub>24</sub>H<sub>31</sub>N<sub>3</sub>O<sub>3</sub> 409.2365<br/>                     found 409.2350</p>                   |
|  | <p><i>N</i>-(2-(<i>tert</i>-butylamino)-1-(1-methyl-1<i>H</i>-pyrrol-2-yl)-2-oxoethyl)-<i>N</i>-(4-methoxybenzyl)-3-(4-methoxyphenyl)propiolamide (<b>5e</b>)</p> <p>White solid, Yield 84%, Melting point: 161-163 °C.<br/>                     HRMS calculated for C<sub>29</sub>H<sub>33</sub>N<sub>3</sub>O<sub>4</sub> 487.2471<br/>                     found 487.2474</p> |
|  | <p><i>N</i>-(2-(<i>tert</i>-butylamino)-2-oxo-1-(1-(<i>p</i>-tolyl)-1<i>H</i>-pyrrol-2-yl)ethyl)-<i>N</i>-(4-methoxybenzyl)but-2-ynamide (<b>5f</b>)</p> <p>Yellow solid, Yield 69%, Melting point: 125-127 °C.<br/>                     HRMS calculated for C<sub>29</sub>H<sub>33</sub>N<sub>3</sub>O<sub>3</sub> 471.2522<br/>                     found 471.2520</p>         |

|                                                                                    |                                                                                                                                                                                                                                                                                                                                              |
|------------------------------------------------------------------------------------|----------------------------------------------------------------------------------------------------------------------------------------------------------------------------------------------------------------------------------------------------------------------------------------------------------------------------------------------|
| 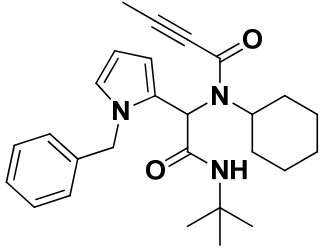  | <p><i>N</i>-(1-(1-benzyl-1<i>H</i>-pyrrol-2-yl)-2-(<i>tert</i>-butylamino)-2-oxoethyl)-<i>N</i>-cyclohexylbut-2-ynamide (<b>5g</b>)</p> <p>Offwhite solid, Yield 53%, Melting point: 165-167 °C.<br/>HRMS calculated for C<sub>27</sub>H<sub>35</sub>N<sub>3</sub>O<sub>2</sub> 433.2729<br/>found 433.2730</p>                              |
|   | <p><i>N</i>-(2-(<i>tert</i>-butylamino)-1-(4-methyl-4<i>H</i>-thieno[3,2-b]pyrrol-5-yl)-2-oxoethyl)-<i>N</i>-(4-methoxybenzyl)but-2-ynamide (<b>5h</b>)</p> <p>Offwhite solid, Yield 93%, Melting point: 179-181 °C.<br/>HRMS calculated for C<sub>25</sub>H<sub>29</sub>N<sub>3</sub>O<sub>3</sub>S 451.1930<br/>found 451.1934</p>         |
|  | <p><i>N</i>-butyl-<i>N</i>-(2-(<i>tert</i>-butylamino)-2-oxo-1-(1-tosyl-1<i>H</i>-pyrrol-2-yl)ethyl)but-2-ynamide (<b>5i</b>)</p> <p>Offwhite solid, Yield 93%, Melting point: 144-146 °C.<br/>HRMS calculated for C<sub>29</sub>H<sub>33</sub>N<sub>3</sub>O<sub>5</sub>S 471.2192<br/>found 371.1401 (M-C<sub>5</sub>H<sub>10</sub>NO)</p> |

**Table I** Optimization of the intramolecular hydroarylation<sup>a</sup>

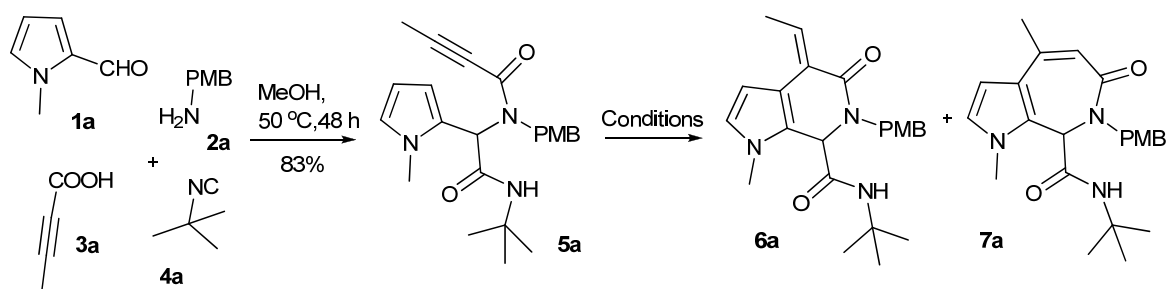

| Entry     | Catalyst (mol %)                                        | Solvent                 | Time (h)  | Temp °C      | Conversion (%) ( <b>6a/7a</b> ) <sup>b</sup> |
|-----------|---------------------------------------------------------|-------------------------|-----------|--------------|----------------------------------------------|
| 1         | AuCl (5)                                                | CDCl <sub>3</sub>       | 24        | 50 °C        | 25 (0/25)                                    |
| 2         | AuCl <sub>3</sub> (5)                                   | CDCl <sub>3</sub>       | 24        | 50 °C        | 35 (0/35)                                    |
| 3         | Au(PPh <sub>3</sub> )Cl (5)                             | CDCl <sub>3</sub>       | 24        | 50 °C        | 0 (0/0)                                      |
| 4         | Au(PPh <sub>3</sub> )OTf (5)                            | CDCl <sub>3</sub>       | 24        | rt           | 47 (47/0)                                    |
| <b>5</b>  | <b>Au(PPh<sub>3</sub>)OTf (5)</b>                       | <b>CDCl<sub>3</sub></b> | <b>3</b>  | <b>50 °C</b> | <b>100 (93/0)</b> <sup>c</sup>               |
| 6         | Au(PPh <sub>3</sub> )SbF <sub>6</sub> (5)               | CDCl <sub>3</sub>       | 24        | rt           | 30 (30/0)                                    |
| 7         | AgOTf (5)                                               | CDCl <sub>3</sub>       | 24        | rt           | 0 (0/0)                                      |
| 8         | AgOTf (5)                                               | CDCl <sub>3</sub>       | 24        | 50 °C        | 50 (0/50)                                    |
| 9         | PtCl <sub>2</sub> (5)                                   | CDCl <sub>3</sub>       | 24        | rt           | 0 (0/0)                                      |
| <b>10</b> | <b>PtCl<sub>2</sub> (5)</b>                             | <b>CDCl<sub>3</sub></b> | <b>14</b> | <b>50 °C</b> | <b>100 (10/82)</b> <sup>c</sup>              |
| 11        | PtCl <sub>2</sub> (5)                                   | CDCl <sub>3</sub>       | 24        | 35 °C        | 10 (0/10)                                    |
| 12        | PtCl <sub>2</sub> (5)                                   | CDCl <sub>3</sub>       | 6         | 80 °C        | 100 (25/75)                                  |
| 13        | PtCl <sub>2</sub> (5)                                   | CDCl <sub>3</sub>       | 4         | 120 °C       | 100 (35/75)                                  |
| 14        | H <sub>2</sub> PtCl <sub>6</sub> ·6H <sub>2</sub> O (5) | CDCl <sub>3</sub>       | 24        | rt           | 0 (0/0)                                      |
| 15        | H <sub>2</sub> PtCl <sub>6</sub> ·6H <sub>2</sub> O (5) | CDCl <sub>3</sub>       | 24        | 50 °C        | traces (0/traces)                            |
| 16        | Au(PPh <sub>3</sub> )OTf (5)                            | ACN-d <sub>3</sub>      | 24        | 50 °C        | 100 (60/0) <sup>c,d</sup>                    |
| 17        | Au(PPh <sub>3</sub> )OTf (5)                            | THF-d <sub>8</sub>      | 24        | 50 °C        | 100 (45/0) <sup>c,d</sup>                    |
| 18        | Au(PPh <sub>3</sub> )OTf (5)                            | Toluene-d <sub>8</sub>  | 24        | 50 °C        | 47 (47/0)                                    |
| 19        | PtCl <sub>2</sub> (5)                                   | ACN-d <sub>3</sub>      | 24        | 50 °C        | 0 (0/0)                                      |
| 20        | PtCl <sub>2</sub> (5)                                   | THF-d <sub>8</sub>      | 24        | 50 °C        | 5 (0/5)                                      |
| 21        | PtCl <sub>2</sub> (5)                                   | Toluene-d <sub>8</sub>  | 24        | 50 °C        | 15 (0/15)                                    |
| 22        | Au(PPh <sub>3</sub> )OTf (2)                            | CDCl <sub>3</sub>       | 24        | 50 °C        | 40 (40/0)                                    |
| 23        | PtCl <sub>2</sub> (2)                                   | CDCl <sub>3</sub>       | 48        | 50 °C        | 50 (10/40)                                   |

<sup>a</sup> All reactions were run on a 0.1 mmol scale of **5a** in a screw capped vial under air. All the reactions in heating were also carried out in screw capped vial under air in an oil bath. <sup>b</sup> Conversion and ratio based on <sup>1</sup>H NMR analysis; <sup>c</sup> Isolated yields; <sup>d</sup> Unidentified byproducts formed. PMB = *p*-methoxybenzyl

### General procedure for Au(PPh<sub>3</sub>)OTf catalyzed cyclization.

To a screw capped vial equipped with a magnetic stir bar was added Au(PPh<sub>3</sub>)Cl (5 mol%) and AgOTf (5 mol%) along with chloroform (2 mL). Ugi product **5a-i** (0.2 mmol) was added and reaction mixture was stirred at 50 °C under air in an oil bath until completion. After completion, reaction mixture was partitioned between EtOAc (100 mL) and water (50 mL). Organic layer was washed with brine (50 mL), dried over magnesium sulfate and evaporated under reduced pressure. The residue obtained was purified by silica gel column chromatography (10% diethyl ether in dichloromethane) to afford compound **6a-i**.

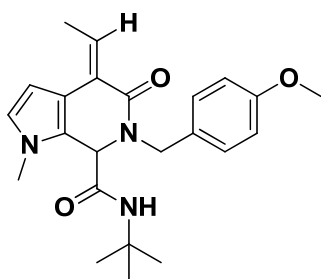

(*E*)-*N*-(*tert*-butyl)-4-ethylidene-6-(4-methoxybenzyl)-1-methyl-5-oxo-4,5,6,7-tetrahydro-1*H*-pyrrolo[2,3-*c*]pyridine-7-carboxamide (**6a**)

Geometry of *exo*-cyclic double bond was confirmed by NOESY NMR experiment.

Offwhite solid, Yield 93%, Melting point: 160-162 °C.

<sup>1</sup>H NMR (300 MHz, CDCl<sub>3</sub>) δ 7.28 (d, *J* = 8.76Hz, 2H), 6.94 (q, 1H), 6.83 (d, *J* = 8.64Hz, 2H), 6.62 (d, *J* = 2.82Hz, 1H), 6.37 (d, *J* = 3.03Hz, 1H), 5.54 (d, *J* = 14.52Hz, 1H), 5.33 (bs, 1H), 4.84 (s, 1H), 3.90 (d, *J* = 14.67Hz, 1H), 3.77 (s, 3H), 3.57 (s, 3H), 2.10 (d, *J* = 7.53, 3H), 1.21 (s, 9H).

<sup>13</sup>C NMR (75 MHz, CDCl<sub>3</sub>) δ 167.9, 164.8, 159.2, 130.1, 129.3, 128.4, 124.5, 123.9, 121.8, 116.0, 114.0, 105.3, 61.3, 55.2, 51.6, 48.7, 34.2, 28.4, 14.8.

HRMS calculated for C<sub>23</sub>H<sub>29</sub>N<sub>3</sub>O<sub>3</sub> 395.2209, found 395.2211.

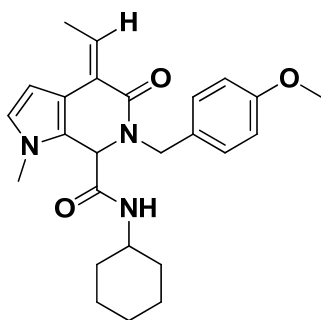

(*E*)-*N*-cyclohexyl-4-ethylidene-6-(4-methoxybenzyl)-1-methyl-5-oxo-4,5,6,7-tetrahydro-1*H*-pyrrolo[2,3-*c*]pyridine-7-carboxamide (**6b**)

White solid, Yield 90%, Melting point: 215-217 °C.

<sup>1</sup>H NMR (300 MHz, CDCl<sub>3</sub>) δ 7.25 (d, *J* = 8.49Hz, 2H), 6.93 (q, 1H), 6.83 (d, *J* = 8.49Hz, 2H), 6.61 (d, *J* = 2.64Hz, 1H), 6.36 (d, *J* = 2.82Hz, 1H), 5.56 (d, *J* = 14.70Hz, 1H), 5.48 (d, *J* = 7.92Hz, 1H), 4.94 (s, 1H), 3.86 (d, *J* = 14.67Hz, 1H), 3.77 (s, 3H), 3.60 (s, 3H), 2.09 (d, *J* = 7.35, 3H), 2.10-2.07 (m, 1H), 1.60-1.54 (m, 4H), 1.34-1.25 (m, 2H), 1.13-0.95 (m, 3H).

<sup>13</sup>C NMR (75 MHz, CDCl<sub>3</sub>) δ 167.8, 165.1, 159.2, 129.9, 129.3, 128.3, 124.6, 124.0, 121.7, 116.1, 114.0, 105.3, 60.2, 55.2, 48.9, 48.5, 34.4, 32.6, 32.4, 25.3, 24.5(2), 14.8.

HRMS calculated for C<sub>25</sub>H<sub>31</sub>N<sub>3</sub>O<sub>3</sub> 421.2365, found 421.2360.

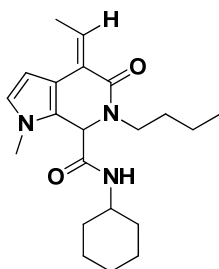

(*E*)-6-butyl-*N*-cyclohexyl-4-ethylidene-1-methyl-5-oxo-4,5,6,7-tetrahydro-1*H*-pyrrolo[2,3-*c*]pyridine-7-carboxamide (**6c**)

White solid, Yield 77%, Melting point: 219-221 °C.

<sup>1</sup>H NMR (300 MHz, CDCl<sub>3</sub>) δ 6.86 (q, 1H), 6.65 (d, *J* = 2.82Hz, 1H), 6.36 (d, *J* = 3.00Hz, 1H), 5.48 (d, *J* = 7.92Hz, 1H), 5.04 (s, 1H), 4.15-4.05 (m, 1H), 3.73 (s, 3H), 3.65-3.59 (m, 1H), 2.93-2.84 (m, 1H), 2.06 (d, *J* = 7.56, 3H), 1.85-1.82 (m, 1H), 1.66-1.55 (m, 7H), 1.37-1.25 (m, 4H), 1.13-0.99 (m, 2H), 0.92 (t, 3H).

<sup>13</sup>C NMR (75 MHz, CDCl<sub>3</sub>) δ 168.2, 164.9, 128.7, 124.6, 124.1, 121.7, 116.2, 105.3, 61.5, 48.5, 47.3, 34.5, 32.6, 32.4, 29.3, 25.3, 24.5, 24.4, 20.2, 14.8, 13.8.

HRMS calculated for C<sub>21</sub>H<sub>31</sub>N<sub>3</sub>O<sub>2</sub> 357.2416, found 357.2395.



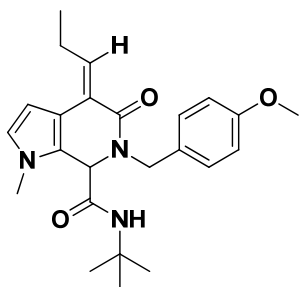

(*E*)-*N*-(*tert*-butyl)-6-(4-methoxybenzyl)-1-methyl-5-oxo-4-propylidene-4,5,6,7-tetrahydro-1*H*-pyrrolo[2,3-*c*]pyridine-7-carboxamide (**6d**)

White solid, Yield 93%, Melting point: 154-156 °C.

**<sup>1</sup>H NMR (300 MHz, CDCl<sub>3</sub>)** δ 7.28 (d, *J*= 8.64Hz, 2H), 6.84-6.79 (m, 3H), 6.61 (d, *J*= 2.82Hz, 1H), 6.32 (d, *J*= 2.82Hz, 1H), 5.53 (d, *J*= 14.52Hz, 1H), 5.33 (bs, 1H), 4.83 (s, 1H), 3.92 (d, *J*=14.49Hz, 1H), 3.77 (s, 3H), 3.57 (s, 3H), 2.56-2.50 (m, 2H), 1.21-1.15 (m, 12H).

**<sup>13</sup>C NMR (75 MHz, CDCl<sub>3</sub>)** δ 167.9, 164.9, 159.2, 136.7, 130.1, 128.4, 124.6, 122.4, 121.9, 115.9, 114.0, 105.3, 61.2, 55.2, 51.6, 48.7, 34.2, 28.4, 22.3, 13.6.

**HRMS** calculated for C<sub>24</sub>H<sub>31</sub>N<sub>3</sub>O<sub>3</sub> 409.2365, found 409.2365.

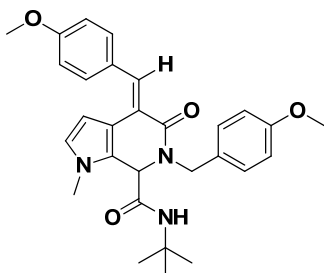

(*E*)-*N*-(*tert*-butyl)-6-(4-methoxybenzyl)-4-(4-methoxybenzylidene)-1-methyl-5-oxo-4,5,6,7-tetrahydro-1*H*-pyrrolo[2,3-*c*]pyridine-7-carboxamide (**6e**)

White solid, Yield 87%, Melting point: 68-70 °C.

**<sup>1</sup>H NMR (300 MHz, CDCl<sub>3</sub>)** δ 7.44 (d, *J*= 8.64Hz, 2H), 7.15 (d, *J*= 8.64Hz, 2H), 6.89 (d, *J*= 8.86Hz, 2H), 6.83 (d, *J*= 8.49Hz, 2H), 6.48 (d, *J*= 2.82Hz, 1H), 6.20 (s, 1H), 5.93 (d, *J*= 2.82Hz, 1H), 5.54 (bs, 1H), 5.38 (d, *J*= 14.67Hz, 1H), 4.85 (s, 1H), 4.42 (d, *J*=14.07Hz, 1H), 3.84 (s, 3H), 3.79 (s, 3H), 3.07 (s, 3H), 1.09 (s, 9H).

**<sup>13</sup>C NMR (75 MHz, CDCl<sub>3</sub>)** δ 167.8, 167.3, 160.2, 159.3, 143.5, 132.6, 129.9, 129.8, 129.2(2), 122.9, 120.2, 118.2, 114.2, 113.6, 108.4, 55.6, 55.3(2), 52.0, 51.7, 33.1, 28.2.

**HRMS** calculated for C<sub>29</sub>H<sub>33</sub>N<sub>3</sub>O<sub>4</sub> 487.2471, found 487.2488.

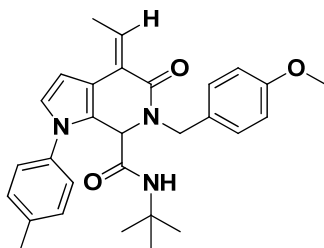

(*E*)-*N*-(*tert*-butyl)-4-ethylidene-6-(4-methoxybenzyl)-5-oxo-1-(*p*-tolyl)-4,5,6,7-tetrahydro-1*H*-pyrrolo[2,3-*c*]pyridine-7-carboxamide (**6f**)

Brown solid, Yield 35%, Melting point: 113-115 °C.

<sup>1</sup>H NMR (300 MHz, CDCl<sub>3</sub>) δ 7.26-7.18 (m, 4H), 7.07-6.96 (m, 3H), 6.86-6.81 (m, 3H), 6.56 (d, *J* = 2.82Hz, 1H), 5.56 (d, *J* = 14.88Hz, 1H), 4.80 (s, 1H), 4.75 (bs, 1H), 3.88 (d, *J* = 14.67Hz, 1H), 3.80 (s, 3H), 2.37 (s, 3H), 2.14 (d, *J* = 7.53, 3H), 1.06 (s, 9H).

<sup>13</sup>C NMR (75 MHz, CDCl<sub>3</sub>) δ 166.5, 165.1, 159.0, 138.1, 136.1, 130.2, 130.1, 129.8, 128.9, 125.0, 124.4, 124.3, 122.0, 118.3, 113.9, 106.8, 59.5, 55.3, 51.3, 48.4, 28.2, 21.0, 14.9.

HRMS calculated for C<sub>29</sub>H<sub>33</sub>N<sub>3</sub>O<sub>3</sub> 471.2522, found 471.2549.

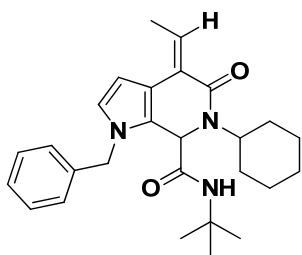

(*E*)-1-benzyl-*N*-(*tert*-butyl)-6-cyclohexyl-4-ethylidene-5-oxo-4,5,6,7-tetrahydro-1*H*-pyrrolo[2,3-*c*]pyridine-7-carboxamide (**6g**)

White solid, Yield 95%, Melting point: 147-149 °C.

<sup>1</sup>H NMR (300 MHz, CDCl<sub>3</sub>) δ 7.34-7.27 (m, 3H), 7.08 (d, *J* = 6.78Hz, 2H), 6.83-6.73 (m, 2H), 6.35 (d, *J* = 2.82Hz, 1H), 5.61 (d, *J* = 15.81Hz, 1H), 5.54 (bs, 1H), 5.12 (d, *J* = 15.99Hz, 1H), 4.71 (s, 1H), 4.44 (m, 1H), 2.07 (d, *J* = 7.53, 3H), 1.76-1.70 (m, 2H), 1.61-1.52 (m, 2H), 1.31-1.25 (m, 4H), 1.19 (s, 9H), 0.96-0.77 (m, 2H).

<sup>13</sup>C NMR (75 MHz, CDCl<sub>3</sub>) δ 169.7, 165.7, 137.5, 128.8, 128.7, 127.6, 126.9, 126.0, 124.1, 123.8, 116.4, 105.4, 57.1, 55.1, 51.6, 51.2, 29.8, 29.4, 28.4, 25.8, 25.5, 25.1, 14.7.

HRMS calculated for C<sub>27</sub>H<sub>35</sub>N<sub>3</sub>O<sub>2</sub> 433.2729, found 433.2725.

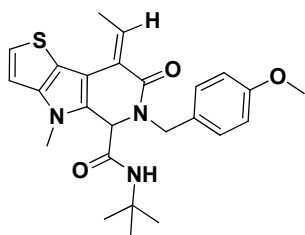

(*E*)-*N*-(*tert*-butyl)-8-ethylidene-6-(4-methoxybenzyl)-4-methyl-7-oxo-5,6,7,8-tetrahydro-4*H*-thieno[2',3':4,5]pyrrolo[2,3-*c*]pyridine-5-carboxamide (**6h**)

Yellow solid, Yield 86%, Melting point: 204-206 °C.

<sup>1</sup>H NMR (300 MHz, CDCl<sub>3</sub>) δ 7.26 (d, *J*= 8.46Hz, 2H), 7.12 (d, *J*= 5.28Hz, 1H), 6.94-6.87 (m, 2H), 6.83 (d, *J*= 8.67Hz, 2H), 5.49-5.44 (m, 2H), 4.89 (s, 1H), 4.01 (d, *J*=14.70Hz, 1H), 3.77 (s, 3H), 3.72 (s, 3H), 2.31 (d, *J*= 7.53, 3H), 1.20 (s, 9H).

<sup>13</sup>C NMR (75 MHz, CDCl<sub>3</sub>) δ 167.5, 165.2, 159.3, 142.4, 129.9, 129.6, 128.1, 127.6, 124.4, 124.2, 118.9, 114.1, 110.1, 108.8, 60.7, 55.2, 51.7, 49.1, 32.6, 28.4, 15.6.

HRMS calculated for C<sub>25</sub>H<sub>29</sub>N<sub>3</sub>O<sub>3</sub>S 451.1930, found 451.1943.

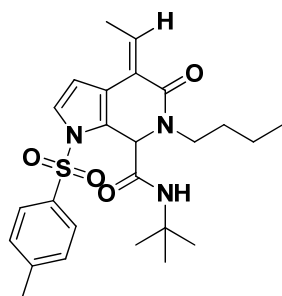

(*E*)-*N*-(*tert*-butyl)-6-butyl-4-ethylidene-5-oxo-1-tosyl-4,5,6,7-tetrahydro-1*H*-pyrrolo[2,3-*c*]pyridine-7-carboxamide (**6i**)

White solid, Yield 72%, Melting point: 114-116 °C.

<sup>1</sup>H NMR (300 MHz, CDCl<sub>3</sub>) δ 7.62 (d, *J*= 8.28Hz, 2H), 7.27 (d, *J*= 8.13Hz, 2H), 6.78 (d, *J*= 4.32Hz, 1H), 6.53 (q, 1H), 5.23 (d, *J*= 4.35Hz, 1H), 4.76 (bs, 1H), 4.52 (s, 1H), 3.90-3.80 (m, 1H), 3.59-3.50 (m, 1H), 2.43 (s, 3H), 1.77-1.67 (m, 2H), 1.48-1.32 (m, 11H), 1.01-0.95 (m, 6H).

<sup>13</sup>C NMR (75 MHz, CDCl<sub>3</sub>) δ 169.2, 165.3, 144.2, 137.3, 136.5, 133.4, 131.6, 129.5, 127.3, 106.3, 72.4, 66.7, 66.1, 55.3, 41.6, 28.5, 27.8, 21.6, 20.1, 13.8, 13.5.

HRMS calculated for C<sub>29</sub>H<sub>33</sub>N<sub>3</sub>O<sub>5</sub>S 471.2192, found 471.2150.

### General procedure for PtCl<sub>2</sub> catalyzed cyclization.

To a screw capped vial equipped with a magnetic stir bar was added PtCl<sub>2</sub> (5 mol%) along with chloroform (2 mL). Ugi product **5a-i** (0.2 mmol) was added and reaction mixture was stirred at 50 °C under air in an oil bath until completion. After completion, reaction mixture was partitioned between EtOAc (100 mL) and water (50 mL). Organic layer was washed with brine (50 mL), dried over magnesium sulfate and evaporated under reduced pressure. The residue obtained was purified by silica gel column chromatography (20% diethyl ether in dichloromethane) to afford compound **7a-d, f-h**.

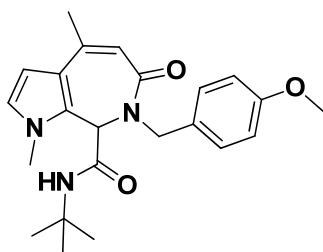

*N*-(*tert*-butyl)-7-(4-methoxybenzyl)-1,4-dimethyl-6-oxo-1,6,7,8-tetrahydropyrrolo[2,3-*c*]azepine-8-carboxamide (**7a**)

White solid, Yield 82%, Melting point: 110-112 °C.

<sup>1</sup>H NMR (400 MHz, CDCl<sub>3</sub>) δ 7.16 (d, *J*= 8.56Hz, 2H), 6.82 (d, *J*= 8.32Hz, 2H), 6.49(d, *J*= 2.76Hz, 1H), 6.17 (d, *J*= 2.76Hz, 1H), 5.94 (s, 1H), 5.35 (bs, 1H), 5.20 (d, *J*= 14.36Hz, 1H), 4.76 (s, 1H), 4.46 (d, *J*=14.60Hz, 1H), 3.78 (s, 3H), 3.11 (s, 3H), 2.13 (s, 3H), 1.15 (s, 9H).

<sup>13</sup>C NMR (75 MHz, CDCl<sub>3</sub>) δ 167.4, 167.2, 159.3, 141.3, 129.9, 129.3, 128.0, 123.0, 121.3, 118.8, 114.2, 105.9, 55.7, 55.3, 52.0, 51.6, 33.2, 28.3, 22.8.

HRMS calculated for C<sub>23</sub>H<sub>29</sub>N<sub>3</sub>O<sub>3</sub> 395.2209, found 395.2211.

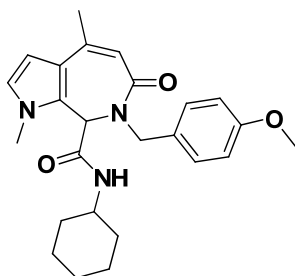

*N*-cyclohexyl-7-(4-methoxybenzyl)-1,4-dimethyl-6-oxo-1,6,7,8-tetrahydropyrrolo[2,3-*c*]azepine-8-carboxamide (**7b**)

White solid, Yield 60%, Melting point: 153-155 °C.

**<sup>1</sup>H NMR (300 MHz, CDCl<sub>3</sub>)** δ 7.15 (d, *J* = 8.64Hz, 2H), 6.82 (d, *J* = 8.67Hz, 2H), 6.49(d, *J* = 2.82Hz, 1H), 6.17 (d, *J* = 2.82Hz, 1H), 5.94 (s, 1H), 5.40 (d, *J* = 8.28Hz, 1H), 5.25 (d, *J* = 14.49Hz, 1H), 4.82 (s, 1H), 4.43 (d, *J* = 14.49Hz, 1H), 3.78 (s, 3H), 3.67-3.57 (m, 1H), 3.10 (s, 3H), 2.12 (d, *J* = 0.75Hz, 3H), 1.70-1.55 (m, 4H), 1.29-1.20 (m, 2H), 0.98-0.86 (m, 4H).

**<sup>13</sup>C NMR (75 MHz, CDCl<sub>3</sub>)** δ 167.5, 167.0, 159.3, 141.4, 129.9, 129.2, 127.7, 123.0, 121.5, 118.7, 114.3, 105.9, 55.3, 55.1, 51.9, 48.5, 33.2, 32.8, 32.5, 25.3, 24.5(2), 22.9.

**HRMS** calculated for C<sub>25</sub>H<sub>31</sub>N<sub>3</sub>O<sub>3</sub> 421.2365, found 421.2362.

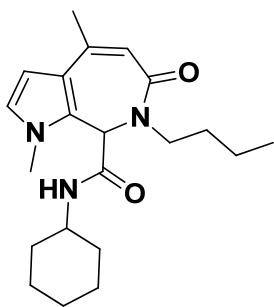

7-butyl-*N*-cyclohexyl-1,4-dimethyl-6-oxo-1,6,7,8-tetrahydropyrrolo[2,3-*c*]azepine-8-carboxamide (**7c**)

White solid, Yield 75%, Melting point: 122-124 °C.

**<sup>1</sup>H NMR (300 MHz, CDCl<sub>3</sub>)** δ 6.62(d, *J* = 2.82Hz, 1H), 6.19 (d, *J* = 2.85Hz, 1H), 5.86 (s, 1H), 5.68 (d, *J* = 8.07Hz, 1H), 4.88 (s, 1H), 3.89-3.79 (m, 1H), 3.72 (m, 4H), 3.48-3.39 (m, 1H), 2.10 (d, *J* = 0.96Hz, 3H), 1.79-1.71 (m, 2H), 1.59-1.54 (m, 5H), 1.33-1.25 (m, 4H), 1.11-1.02 (m, 3H), 0.90 (t, 3H).

**<sup>13</sup>C NMR (75 MHz, CDCl<sub>3</sub>)** δ 167.2, 167.0, 141.1, 127.8, 123.3, 121.5, 118.8, 106.1, 57.5, 50.3, 48.7, 34.0, 32.8, 32.6, 31.0, 25.3, 24.6, 24.5, 22.9, 20.0, 13.9.

**HRMS** calculated for C<sub>21</sub>H<sub>31</sub>N<sub>3</sub>O<sub>2</sub> 357.2416, found 357.2405.

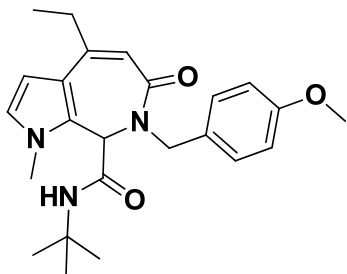

*N*-(*tert*-butyl)-4-ethyl-7-(4-methoxybenzyl)-1-methyl-6-oxo-1,6,7,8-tetrahydropyrrolo[2,3-*c*]azepine-8-carboxamide (**7d**)

White solid, Yield 83%, Melting point: 126-128 °C.

**<sup>1</sup>H NMR (300 MHz, CDCl<sub>3</sub>)** δ 7.16 (d, *J* = 8.67Hz, 2H), 6.83 (d, *J* = 8.67Hz, 2H), 6.49(d, *J* = 2.82Hz, 1H), 6.16 (d, *J* = 2.82Hz, 1H), 5.94 (s, 1H), 5.39 (bs, 1H), 5.16 (d, *J* = 14.67Hz, 1H), 4.77 (s, 1H), 4.50 (d, *J* = 14.49Hz, 1H), 3.79 (s, 3H), 3.13 (s, 3H), 2.53-2.41 (m, 2H), 1.15-1.10 (m, 12H).

**<sup>13</sup>C NMR (75 MHz, CDCl<sub>3</sub>)** δ 167.7, 167.2, 159.3, 147.0, 129.9, 129.3, 128.4, 123.0, 120.5, 117.1, 114.3, 105.5, 55.8, 55.3, 52.0, 51.6, 33.2, 29.5, 28.3, 13.2.

**HRMS** calculated for C<sub>24</sub>H<sub>31</sub>N<sub>3</sub>O<sub>3</sub> 409.2365, found 409.2338.

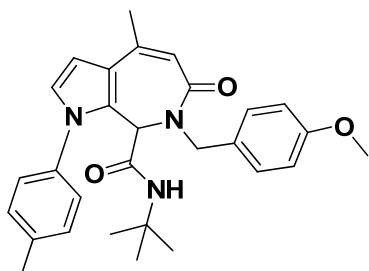

*N*-(*tert*-butyl)-7-(4-methoxybenzyl)-4-methyl-6-oxo-1-(*p*-tolyl)-1,6,7,8-tetrahydropyrrolo[2,3-*c*]azepine-8-carboxamide (**7f**)

Sticky solid, Yield 63%.

**<sup>1</sup>H NMR (300 MHz, CDCl<sub>3</sub>)** δ 7.16 (d, *J* = 7.92Hz, 2H), 6.97-6.90 (m, 4H), 6.73-6.69 (m, 3H), 6.33 (d, *J* = 2.82Hz, 1H), 5.99 (s, 1H), 5.31 (bs, 1H), 4.73 (s, 1H), 4.67 (d, *J* = 14.49Hz, 1H), 4.53 (d, *J* = 14.31Hz, 1H), 3.78 (s, 3H), 2.42 (s, 3H), 2.19 (s, 3H), 1.13 (s, 9H).

**<sup>13</sup>C NMR (75 MHz, CDCl<sub>3</sub>)** δ 167.6, 167.1, 159.2, 141.2, 138.0, 135.4, 129.9(2), 129.1, 128.4, 125.7, 123.1, 121.8, 119.4, 114.1, 106.9, 56.2, 55.2, 51.9, 51.6, 28.3, 22.9, 21.1.

**HRMS** calculated for C<sub>29</sub>H<sub>33</sub>N<sub>3</sub>O<sub>3</sub> 471.2522, found 471.2492.

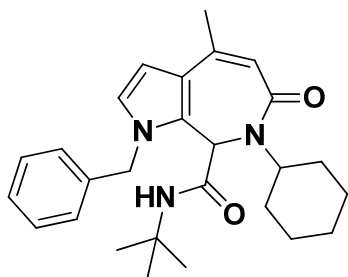

1-benzyl-*N*-(*tert*-butyl)-7-cyclohexyl-4-methyl-6-oxo-1,6,7,8-tetrahydropyrrolo[2,3-*c*]azepine-8-carboxamide (**7g**)

Green solid, Yield 50%, Melting point: 157-159 °C.

**<sup>1</sup>H NMR (300 MHz, CDCl<sub>3</sub>)** δ 7.36-7.31 (m, 3H), 7.22-7.19 (m, 2H), 6.75 (d, *J*= 2.64Hz, 1H), 6.26 (d, *J*= 2.61Hz, 1H), 5.89 (s, 1H), 5.32-5.26 (m, 2H), 5.14 (d, *J*= 15.99Hz, 1H), 4.84 (s, 1H), 4.50-4.42 (m, 1H), 2.10 (s, 3H), 1.95-1.92 (m, 1H), 1.81-1.78 (m, 1H), 1.67-1.49 (m, 2H), 1.40-1.25 (m, 4H), 1.10 (s, 9H), 0.97-0.72 (m, 2H).

**<sup>13</sup>C NMR (75 MHz, CDCl<sub>3</sub>)** δ 167.4, 167.1, 139.8, 136.8, 129.2, 128.6, 128.3, 126.9, 123.3, 122.5, 119.9, 106.4, 54.5, 52.2, 51.4, 51.2, 32.0, 31.0, 28.2, 25.8, 25.6, 25.4, 22.7.

**HRMS** calculated for C<sub>27</sub>H<sub>35</sub>N<sub>3</sub>O<sub>2</sub> 433.2729, found 433.2711.

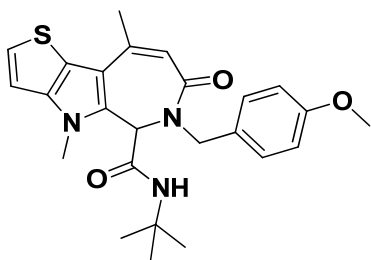

*N*-(*tert*-butyl)-6-(4-methoxybenzyl)-4,9-dimethyl-7-oxo-4,5,6,7-tetrahydrothieno[2',3':4,5]pyrrolo[2,3-*c*]azepine-5-carboxamide (**7h**)

Green solid, Yield 79%, Melting point: 210-212 °C.

**<sup>1</sup>H NMR (300 MHz, CDCl<sub>3</sub>)** δ 7.20 (d, *J*= 8.67Hz, 2H), 7.13 (d, *J*= 5.25Hz, 1H), 6.88-6.82 (m, 3H), 6.00 (s, 1H), 5.46 (bs, 1H), 5.15 (d, *J*= 14.49Hz, 1H), 4.87 (s, 1H), 4.54 (d, *J*=14.49Hz, 1H), 3.79 (s, 3H), 3.28 (s, 3H), 2.30 (d, *J*= 0.93Hz, 3H), 1.16 (s, 9H).

**<sup>13</sup>C NMR (75 MHz, CDCl<sub>3</sub>)** δ 167.1, 166.7, 159.5, 140.8, 140.3, 132.9, 130.1, 129.0, 124.2, 120.5, 118.7, 114.4(2), 110.2, 56.2, 55.4, 52.0, 51.9, 31.5, 28.4, 23.4.

**HRMS** calculated for C<sub>25</sub>H<sub>29</sub>N<sub>3</sub>O<sub>3</sub>S 451.1930, found 451.1929.

$^1\text{H}$  and  $^{13}\text{C}$  NMR spectra of compound **5a** (300 MHz,  $\text{CDCl}_3$ )

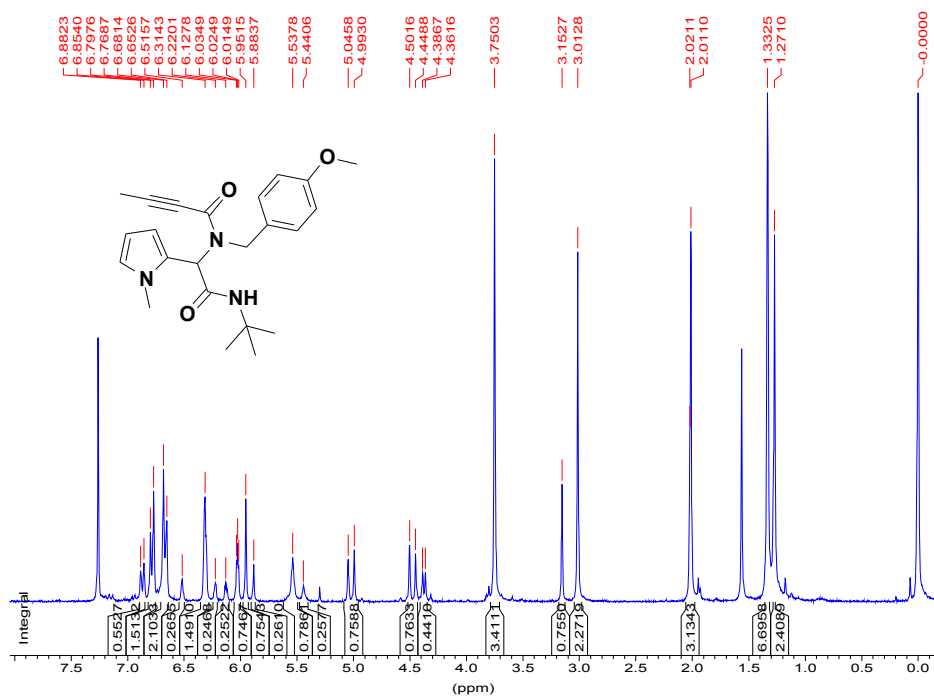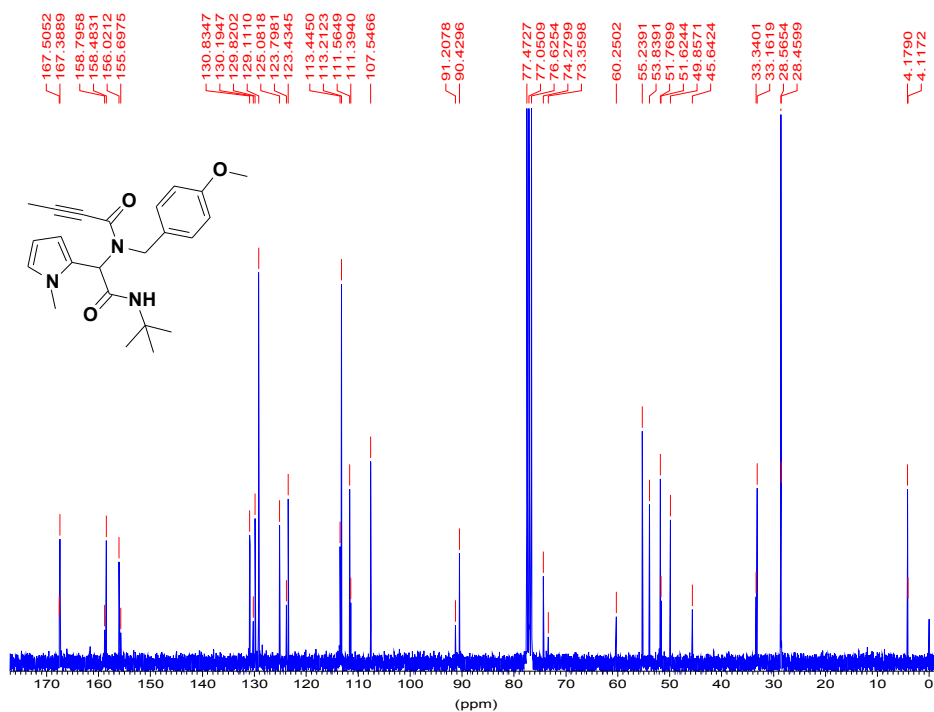



$^1\text{H}$  and  $^{13}\text{C}$  NMR spectra of compound **6a** (300 MHz,  $\text{CDCl}_3$ )

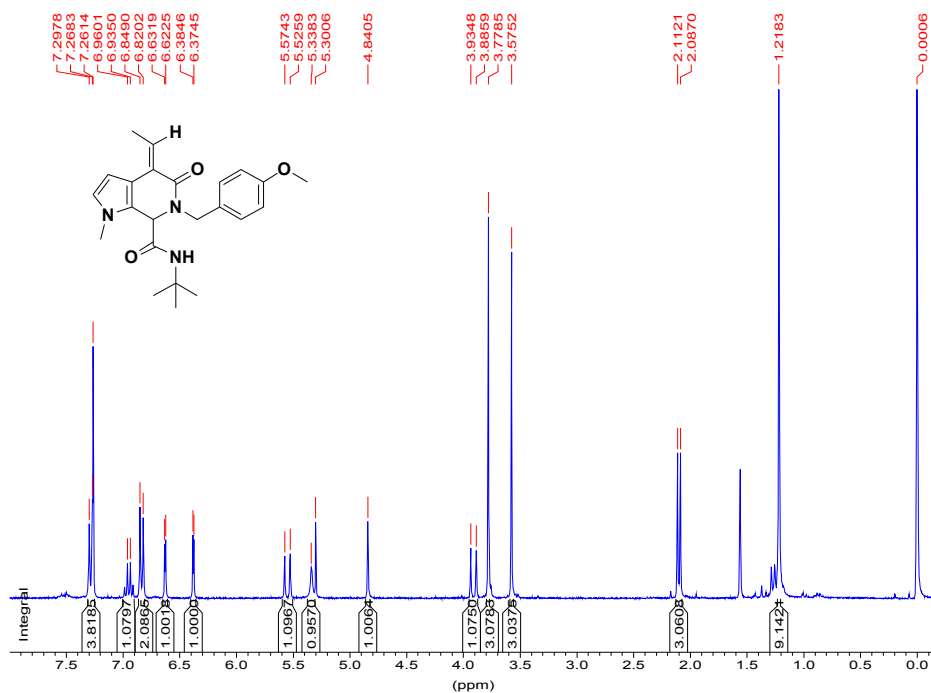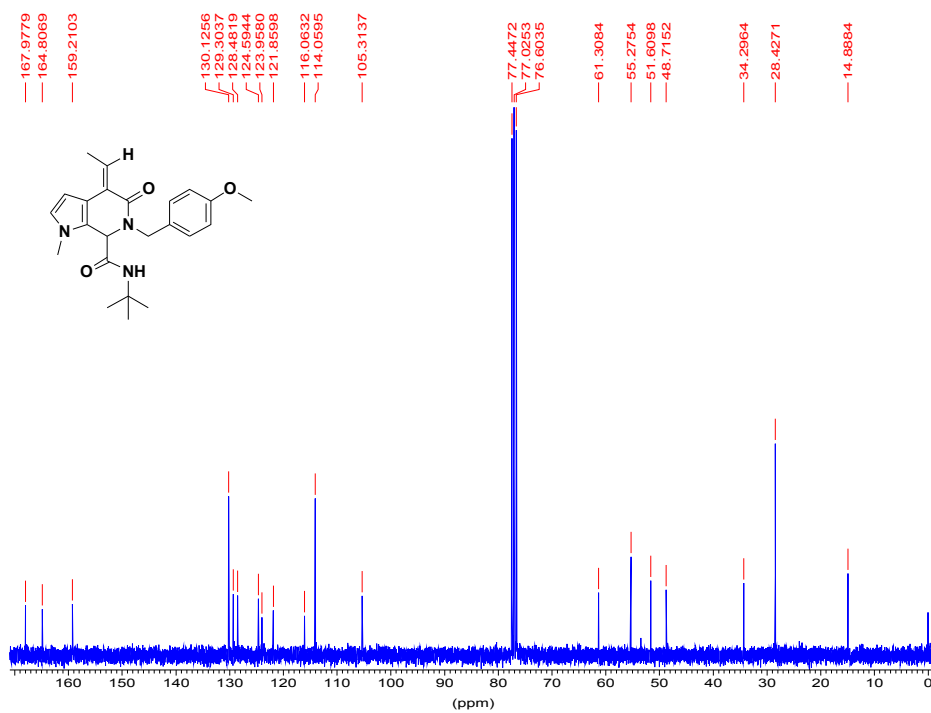

NOESY NMR spectra of compound **6a** (400 MHz, CDCl<sub>3</sub>).

NOESY

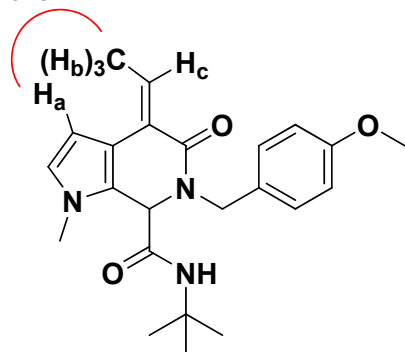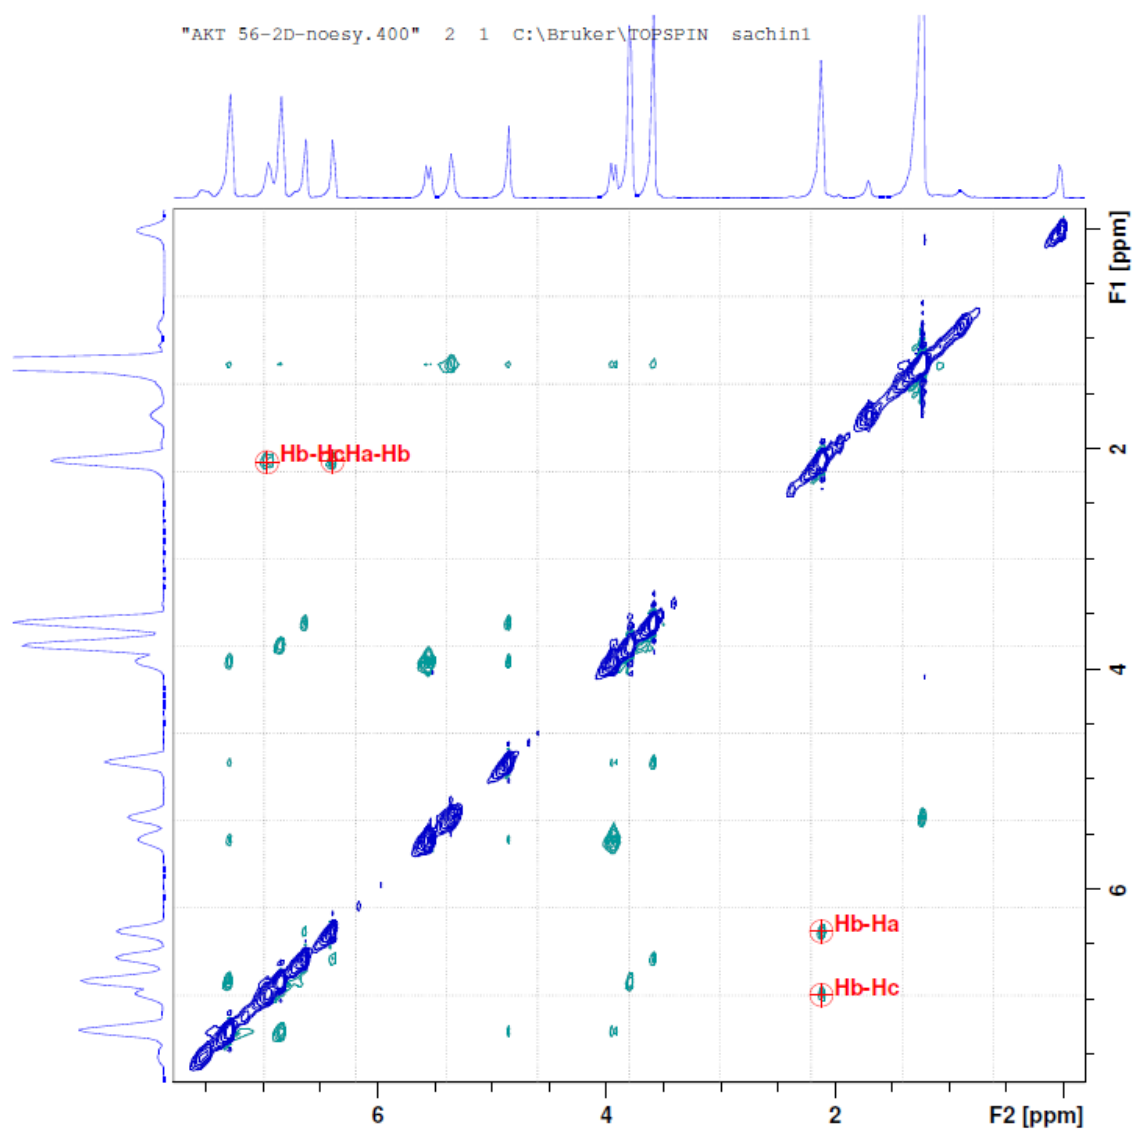

$^1\text{H}$  and  $^{13}\text{C}$  NMR spectra of compound **6b** (300 MHz,  $\text{CDCl}_3$ )

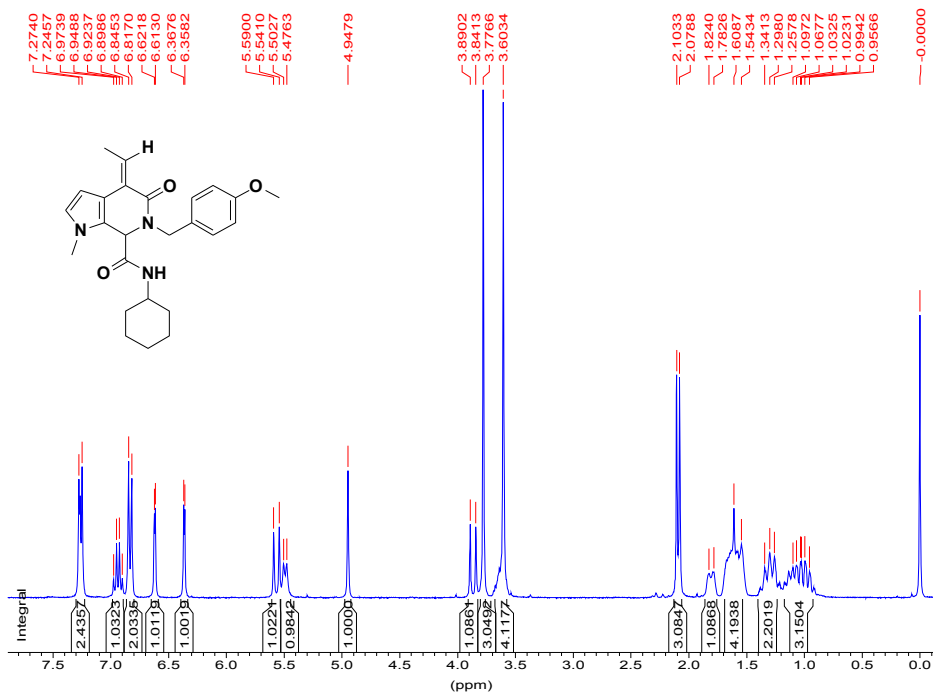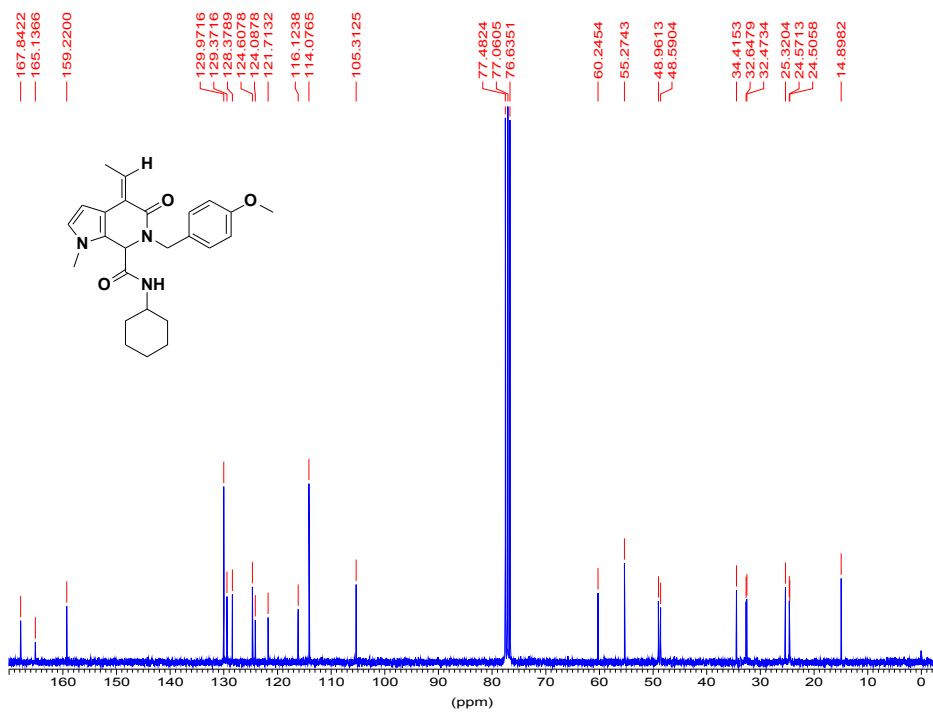

$^1\text{H}$  and  $^{13}\text{C}$  NMR spectra of compound **6c** (300 MHz,  $\text{CDCl}_3$ )

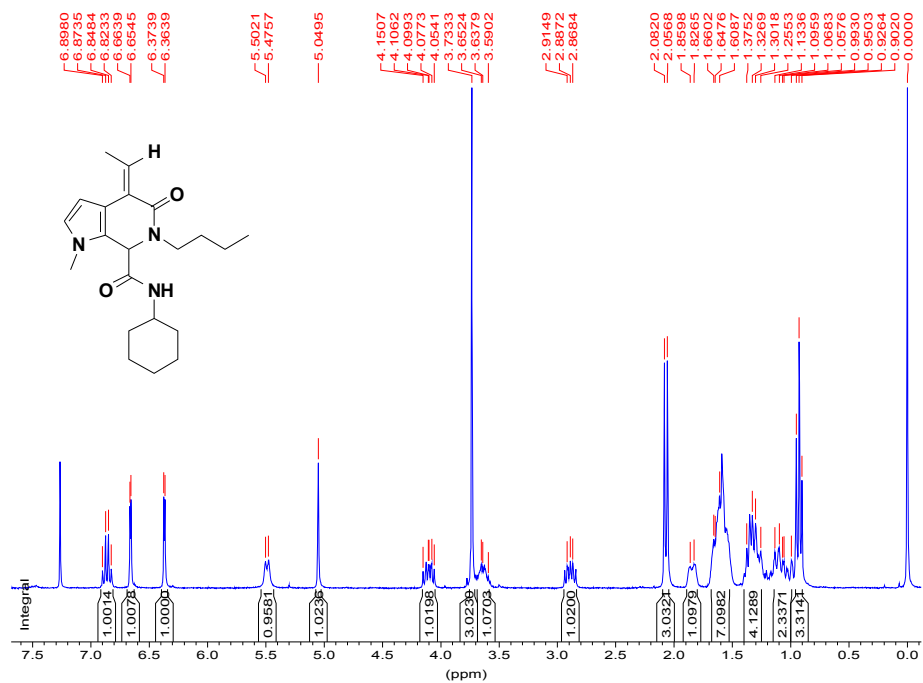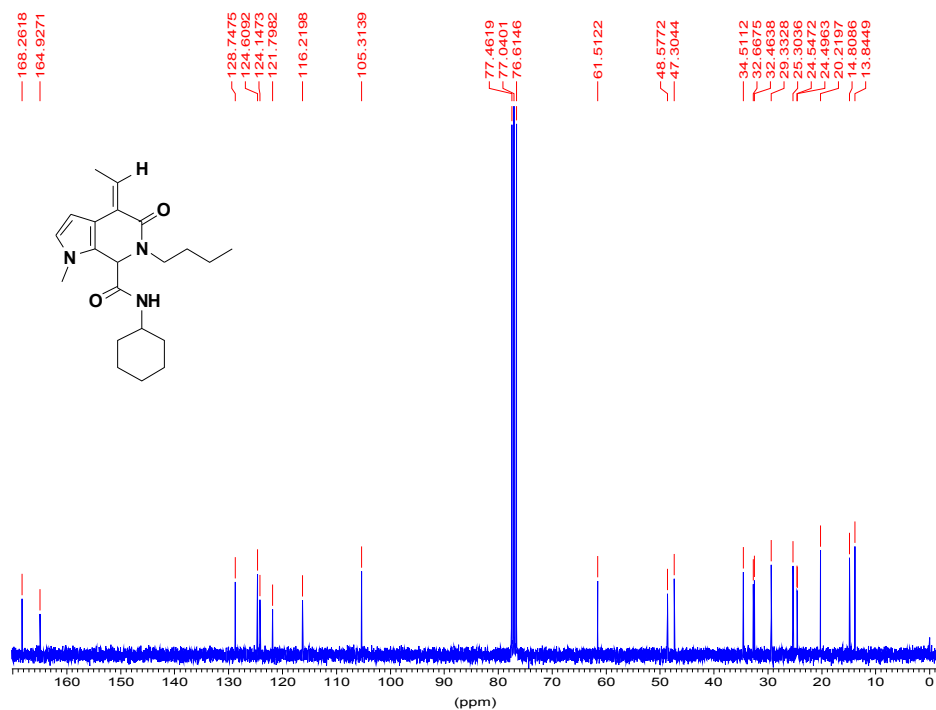

$^1\text{H}$  and  $^{13}\text{C}$  NMR spectra of compound **6d** (300 MHz,  $\text{CDCl}_3$ )

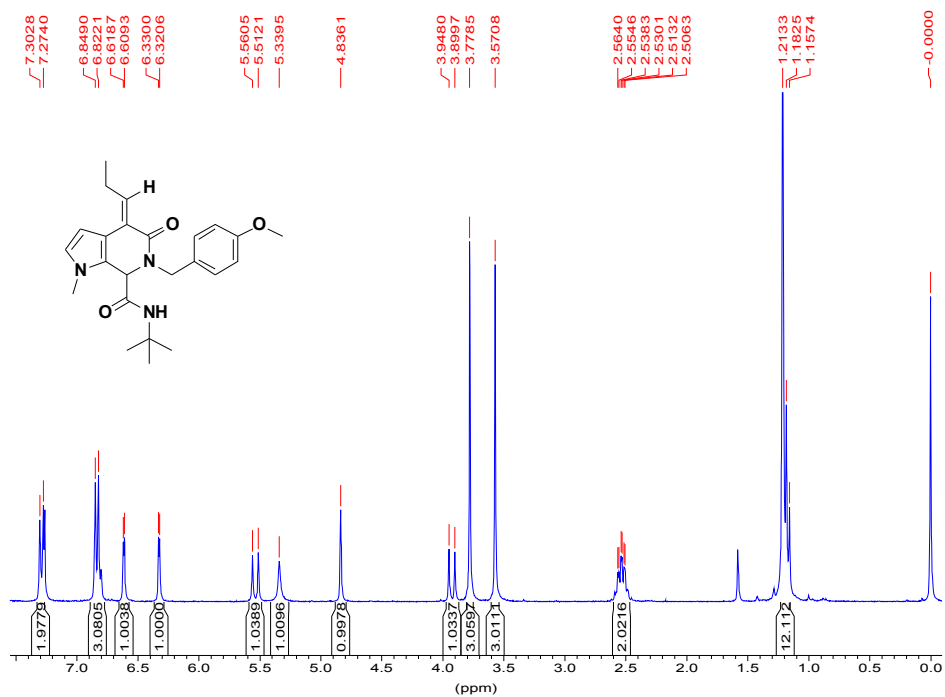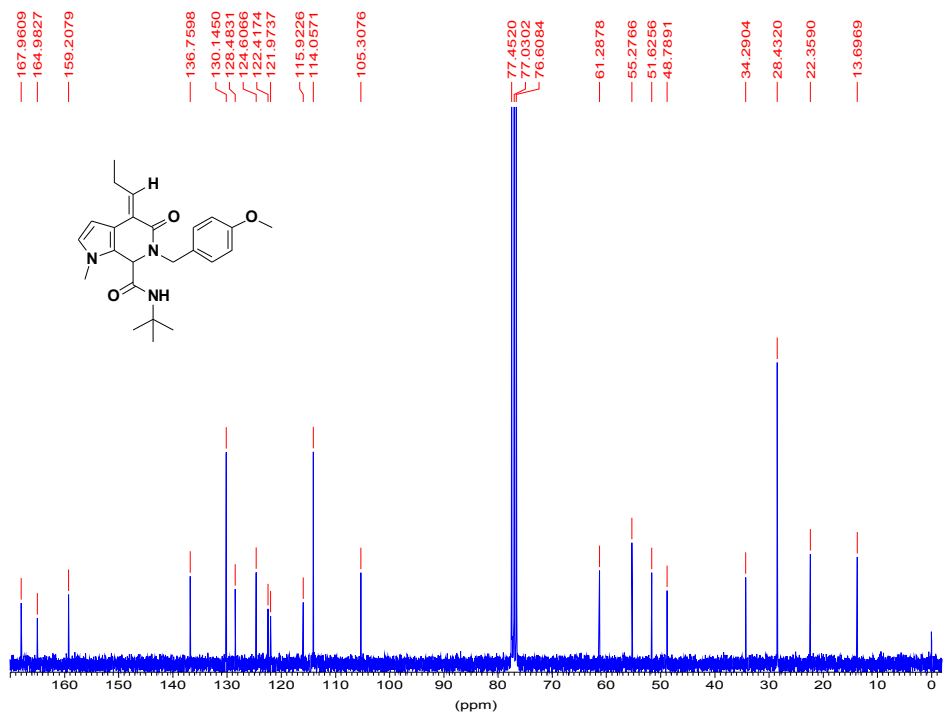

$^1\text{H}$  and  $^{13}\text{C}$  NMR spectra of compound **6e** (300 MHz,  $\text{CDCl}_3$ )

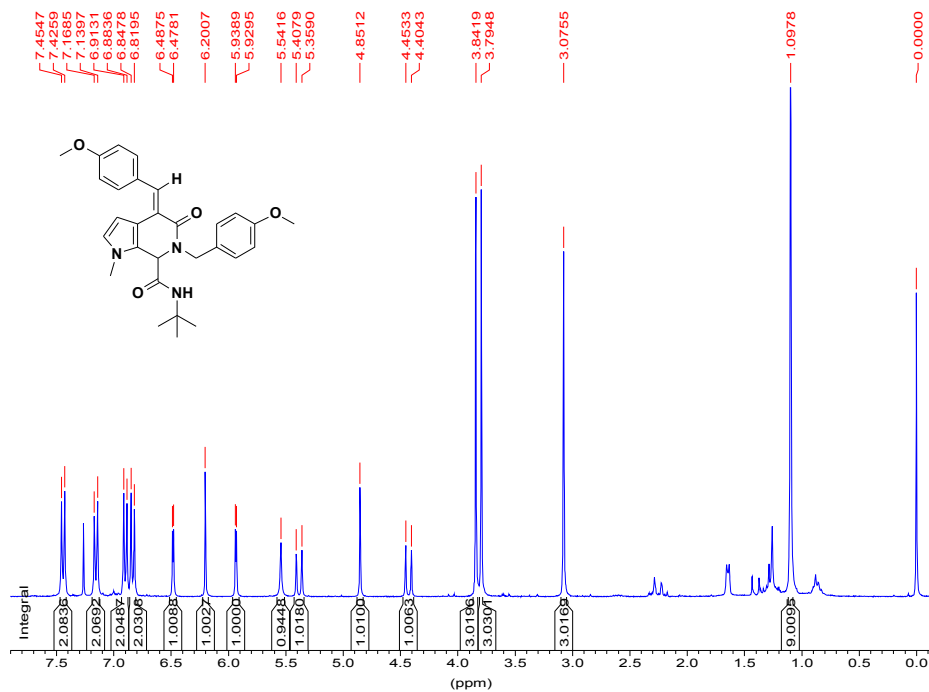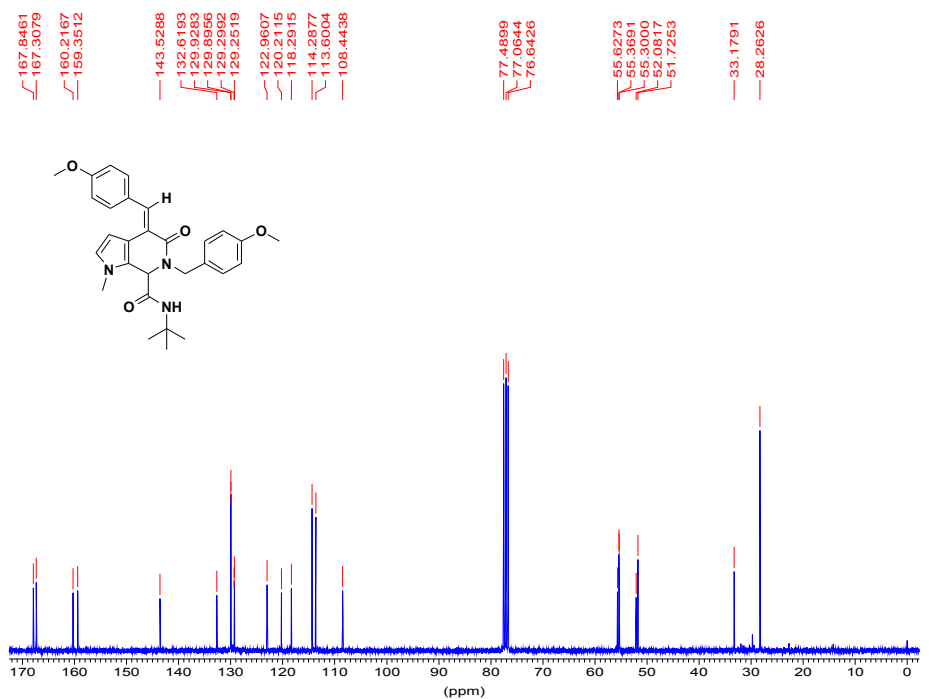

$^1\text{H}$  and  $^{13}\text{C}$  NMR spectra of compound **6f** (300 MHz,  $\text{CDCl}_3$ )

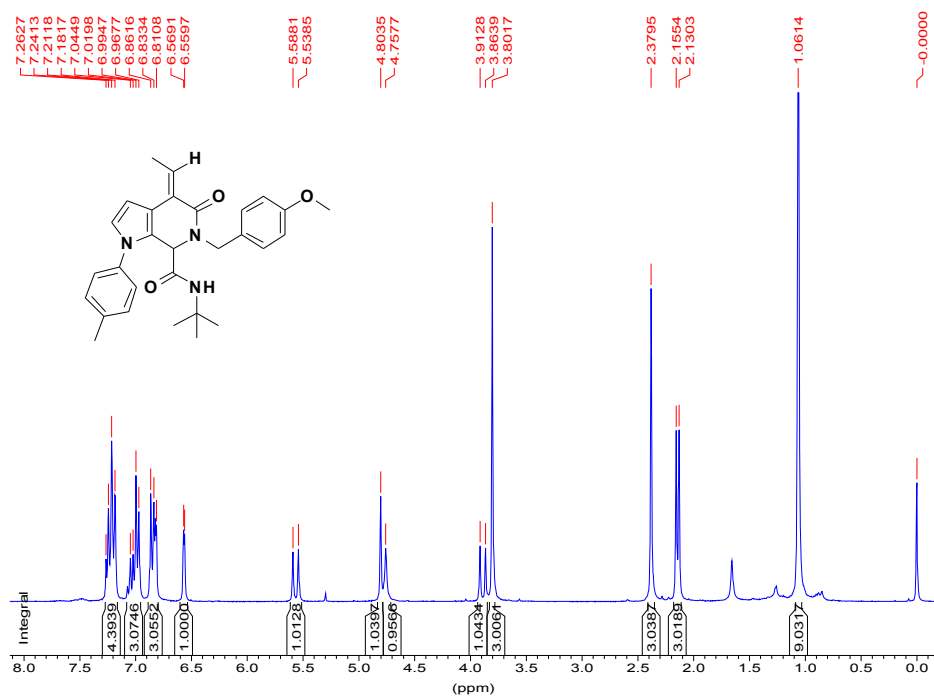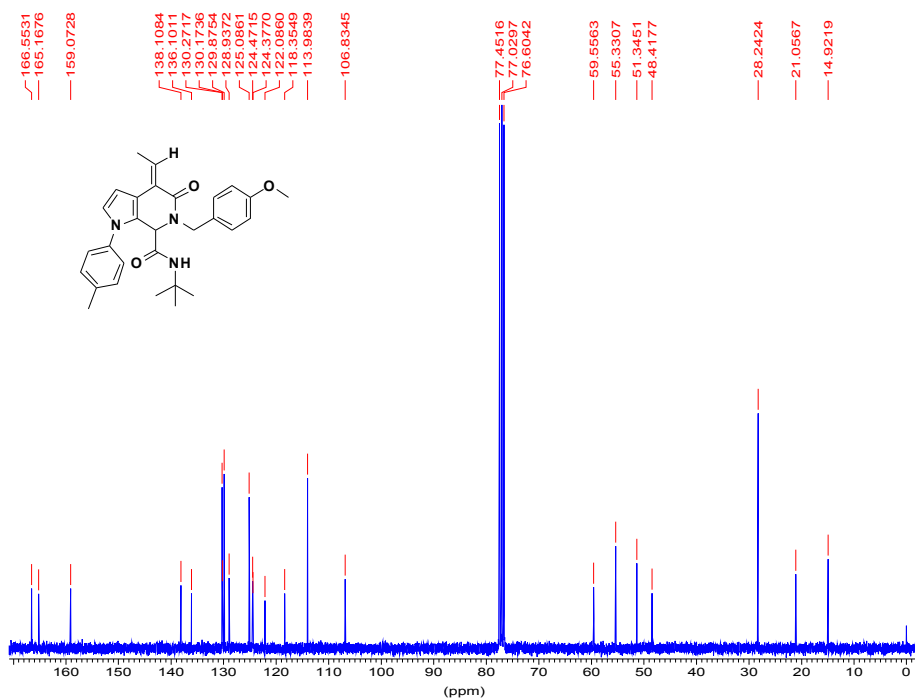

$^1\text{H}$  and  $^{13}\text{C}$  NMR spectra of compound **6g** (300 MHz,  $\text{CDCl}_3$ )

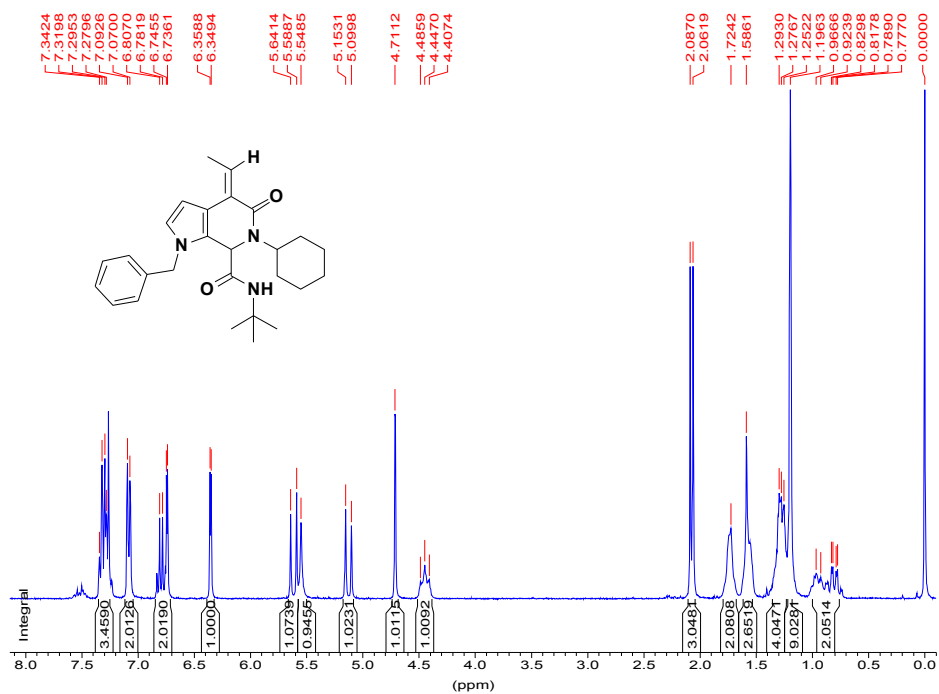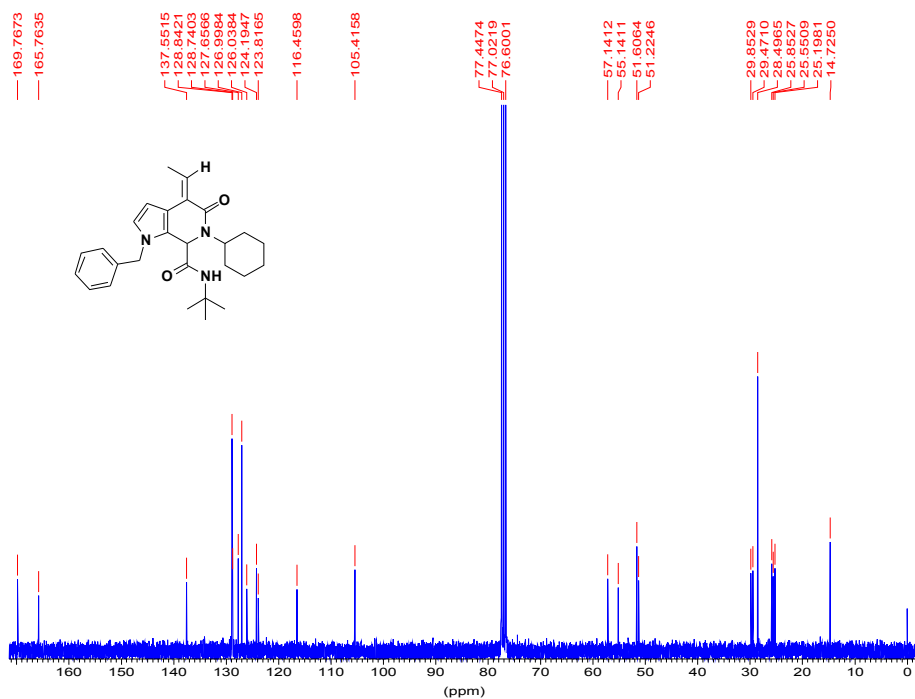



$^1\text{H}$  and  $^{13}\text{C}$  NMR spectra of compound **6h** (300 MHz,  $\text{CDCl}_3$ )

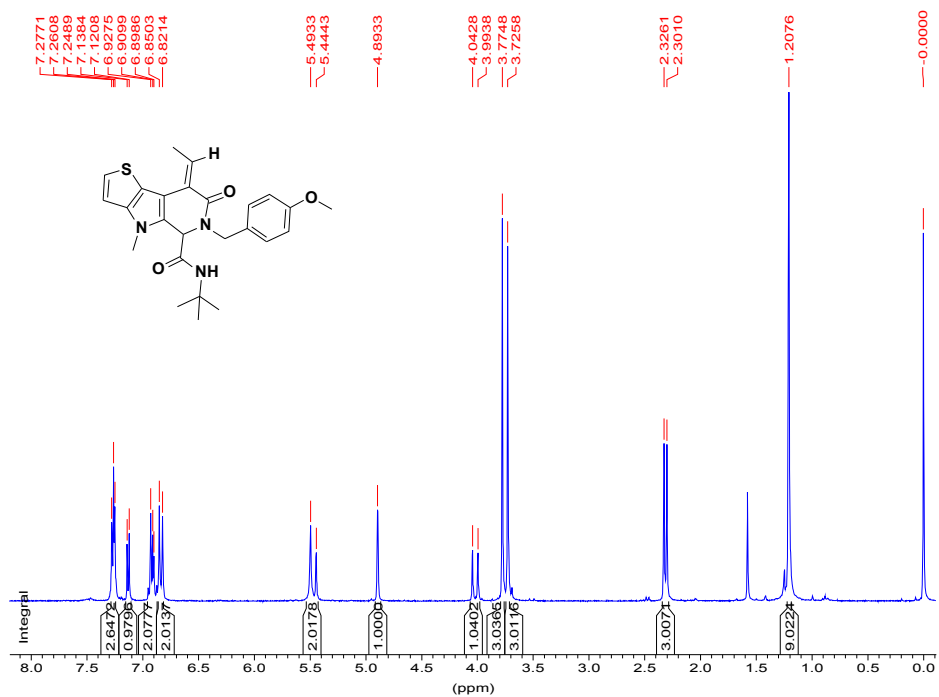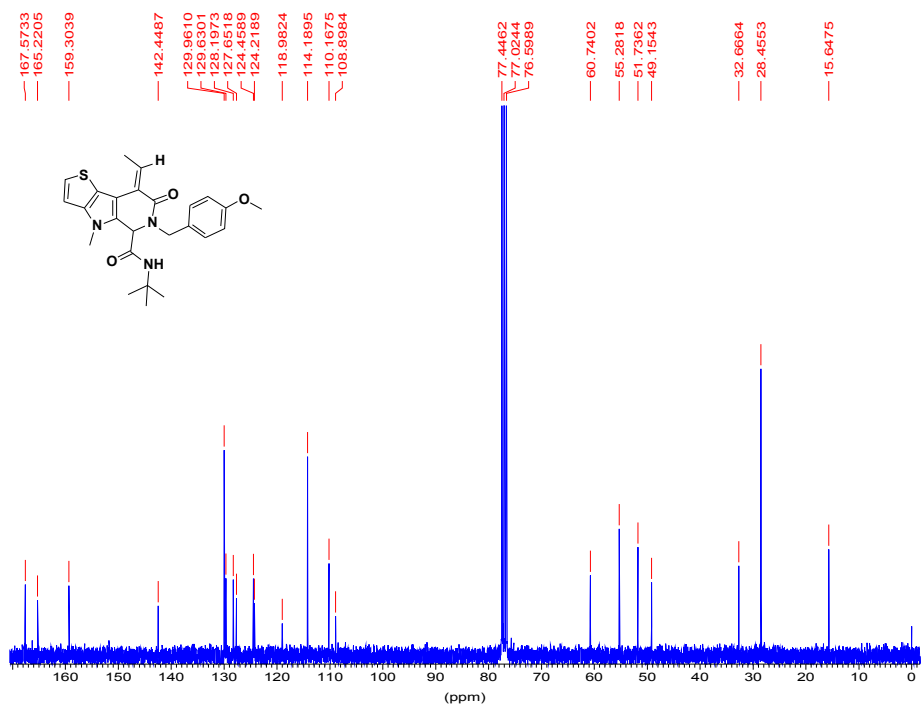

$^1\text{H}$  and  $^{13}\text{C}$  NMR spectra of compound **6i** (300 MHz,  $\text{CDCl}_3$ )

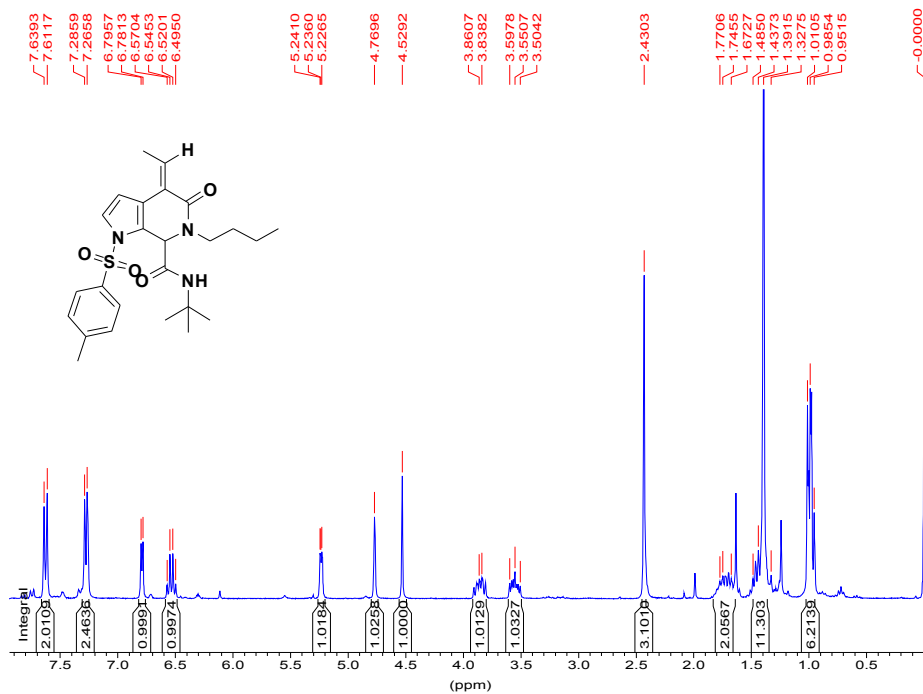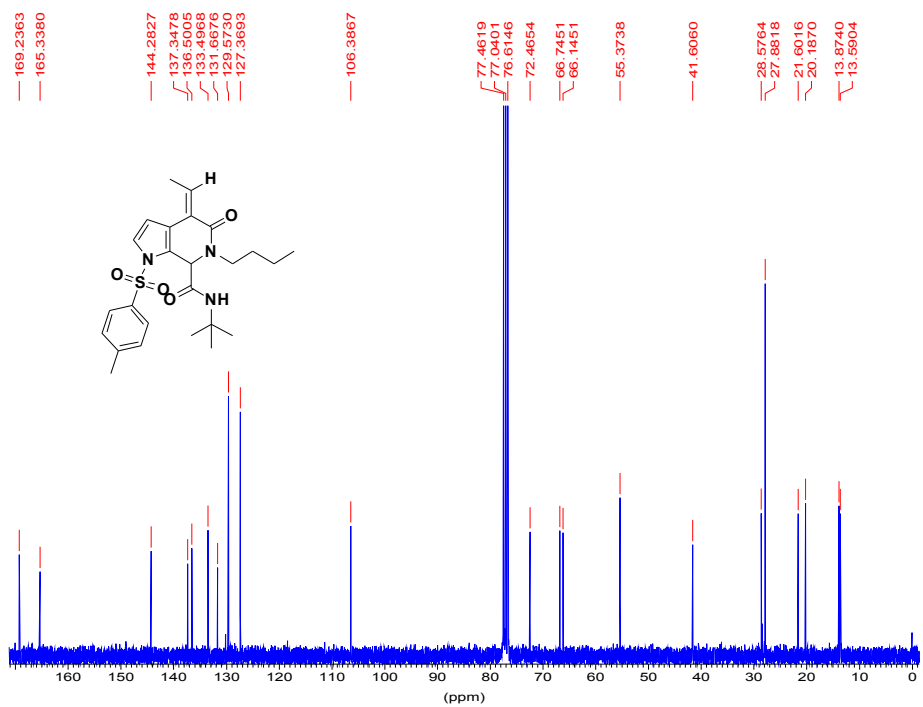

$^1\text{H}$  NMR (400 MHz,  $\text{CDCl}_3$ ) and  $^{13}\text{C}$  NMR (75 MHz,  $\text{CDCl}_3$ ) spectra of compound **7a**

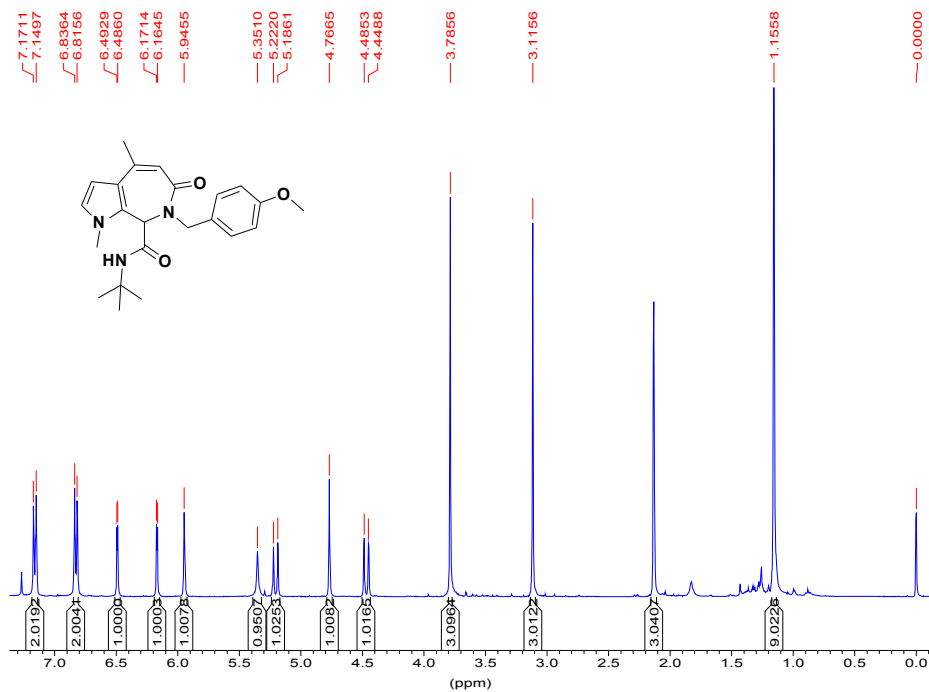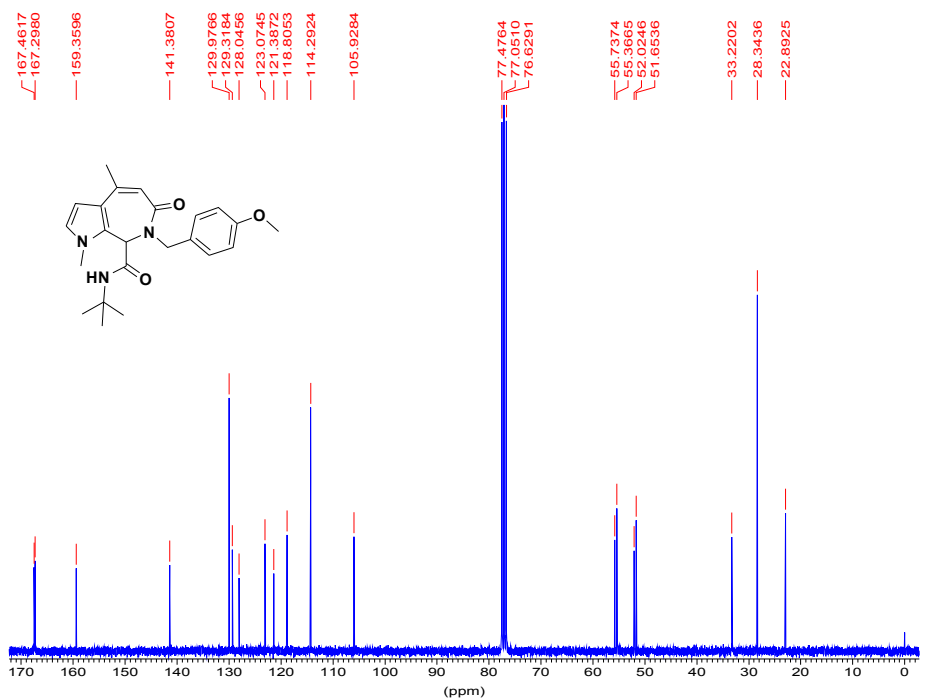

$^1\text{H}$  and  $^{13}\text{C}$  NMR spectra of compound **7b** (300 MHz,  $\text{CDCl}_3$ )

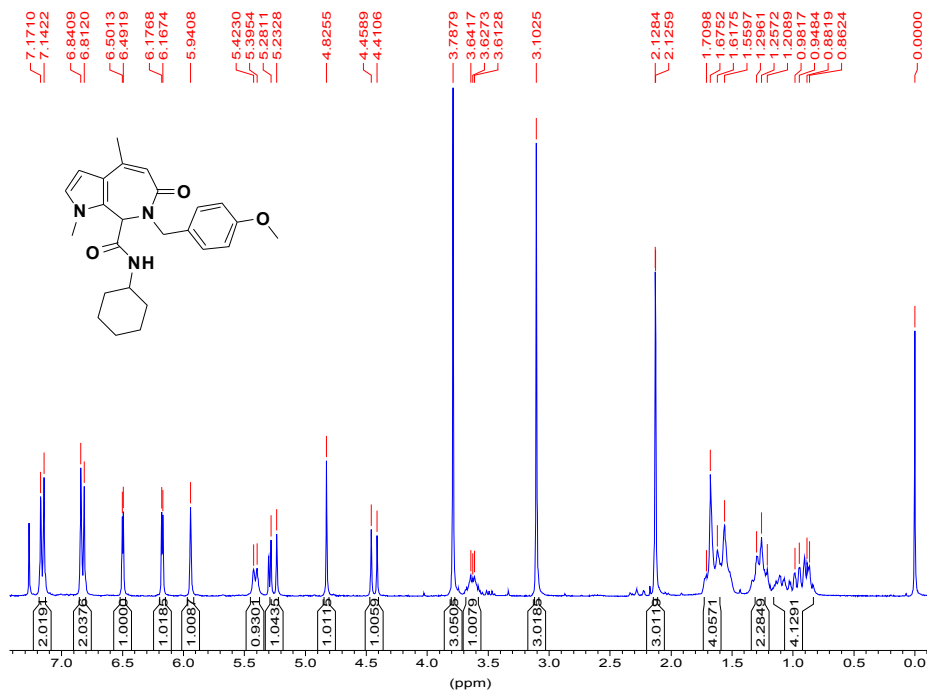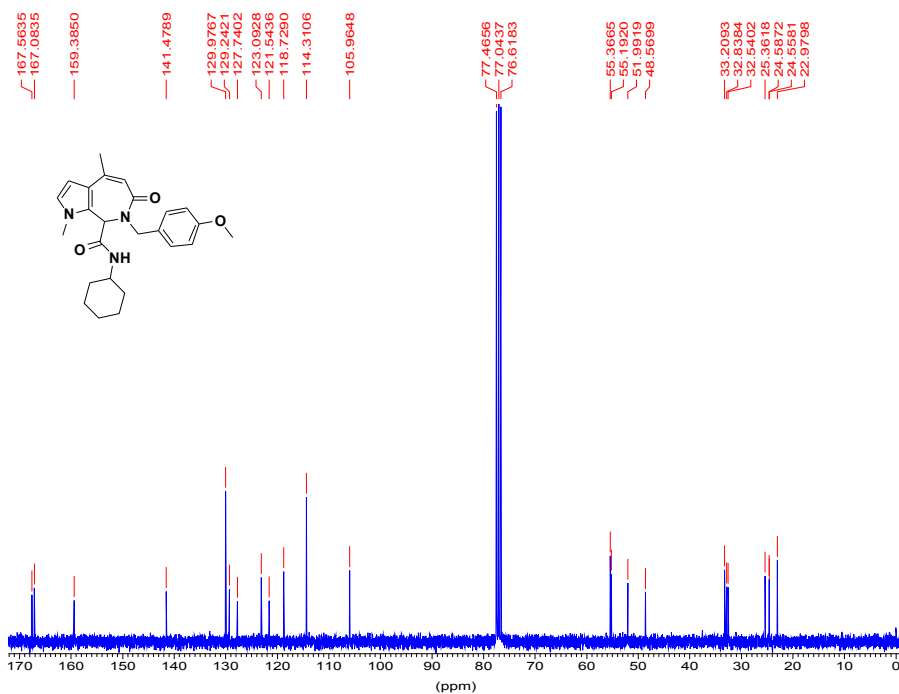

$^1\text{H}$  and  $^{13}\text{C}$  NMR spectra of compound **7c** (300 MHz,  $\text{CDCl}_3$ )

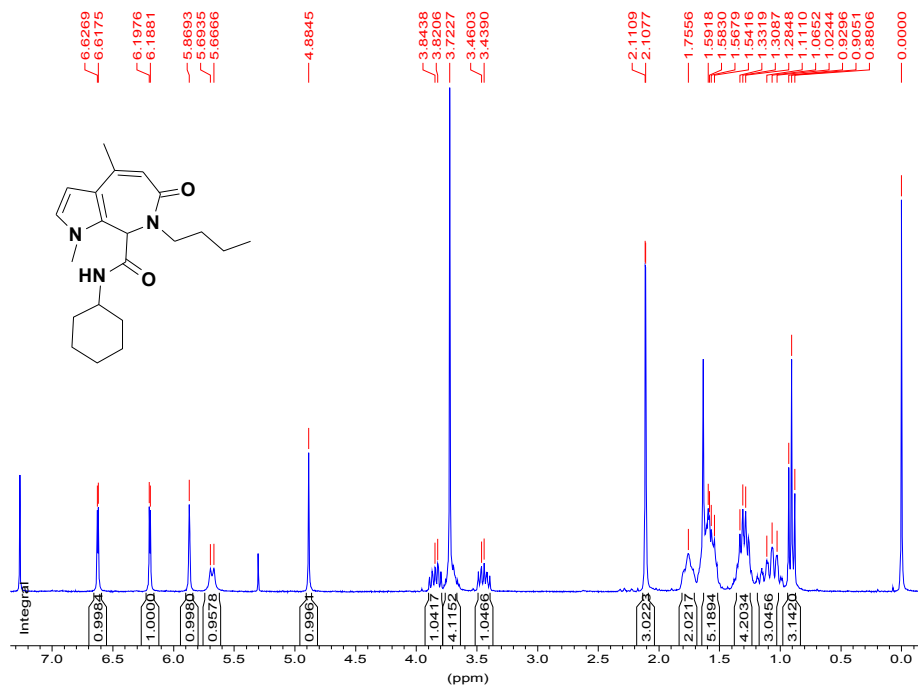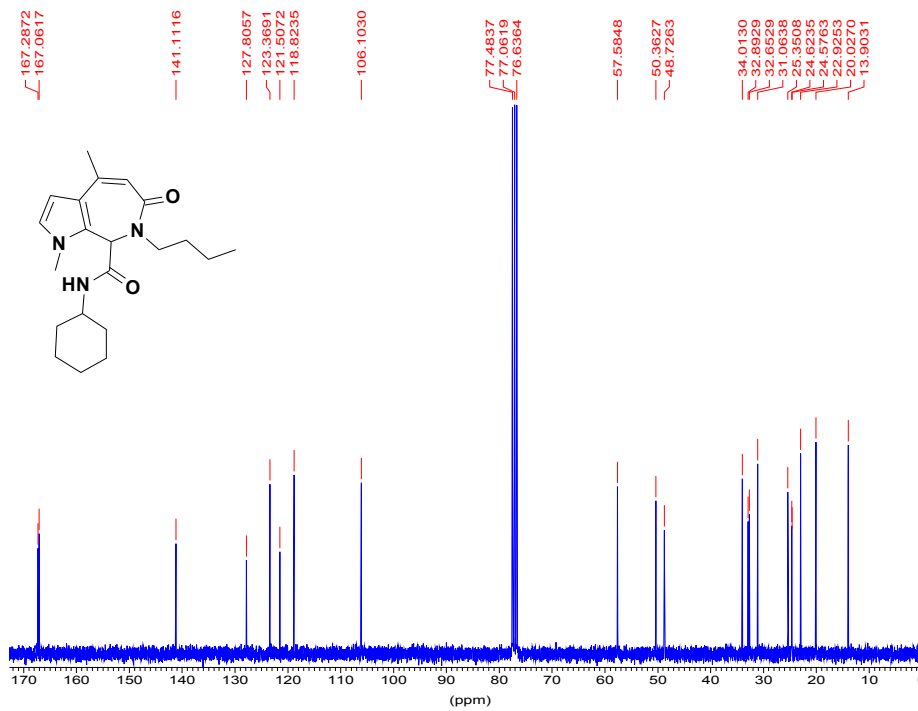

$^1\text{H}$  and  $^{13}\text{C}$  NMR spectra of compound **7d** (300 MHz,  $\text{CDCl}_3$ )

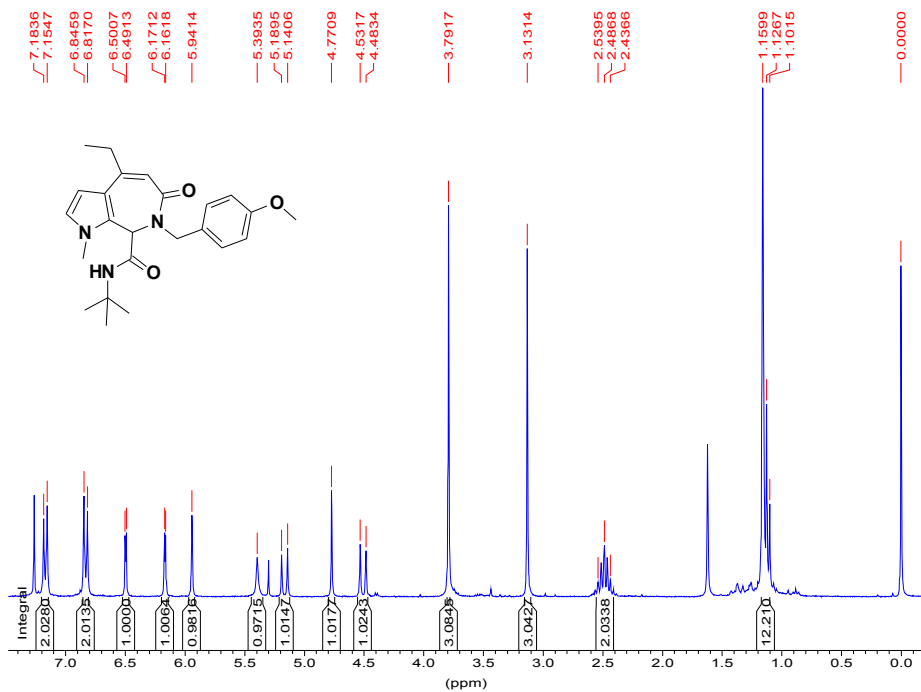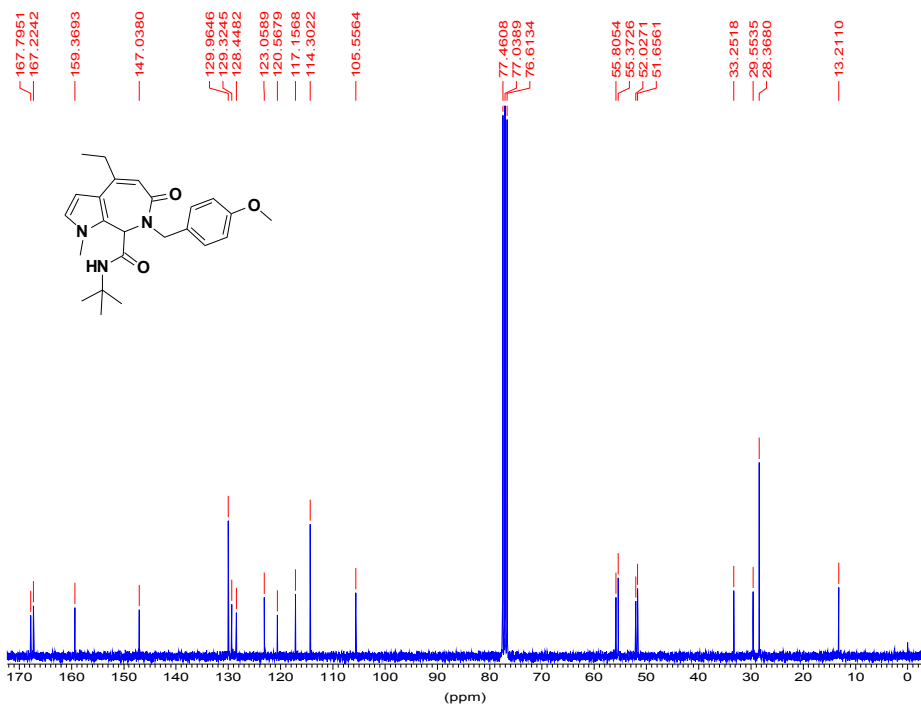

$^1\text{H}$  and  $^{13}\text{C}$  NMR spectra of compound **7f** (300 MHz,  $\text{CDCl}_3$ )

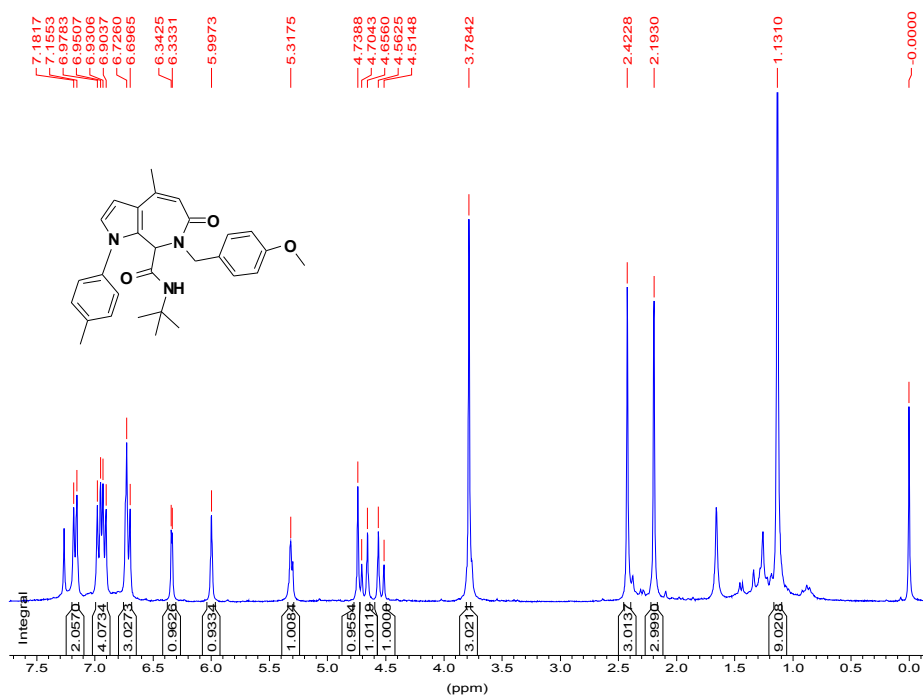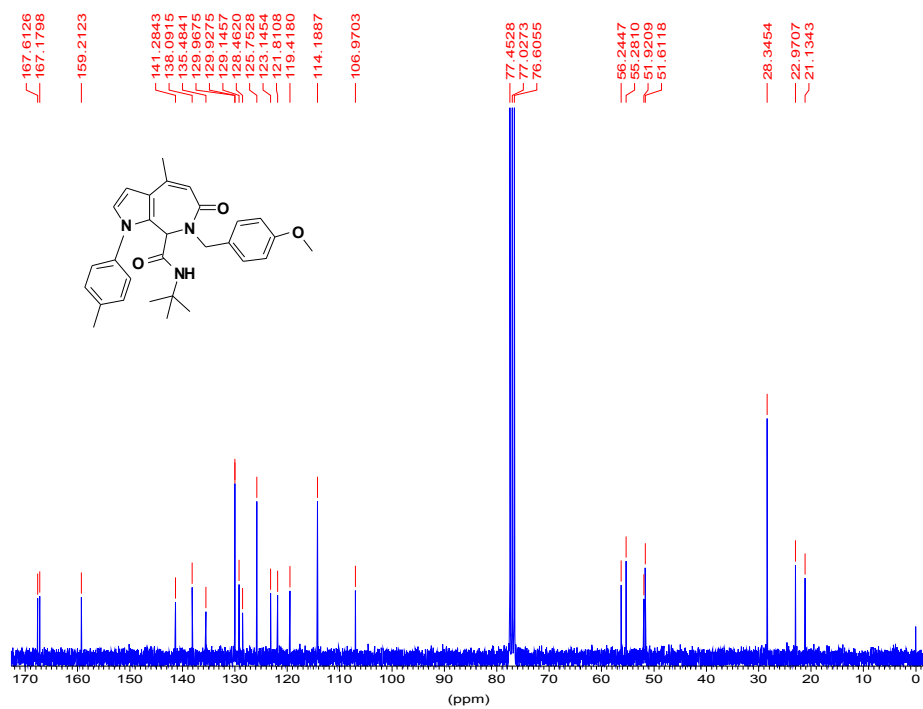

$^1\text{H}$  and  $^{13}\text{C}$  NMR spectra of compound **7g** (300 MHz,  $\text{CDCl}_3$ )

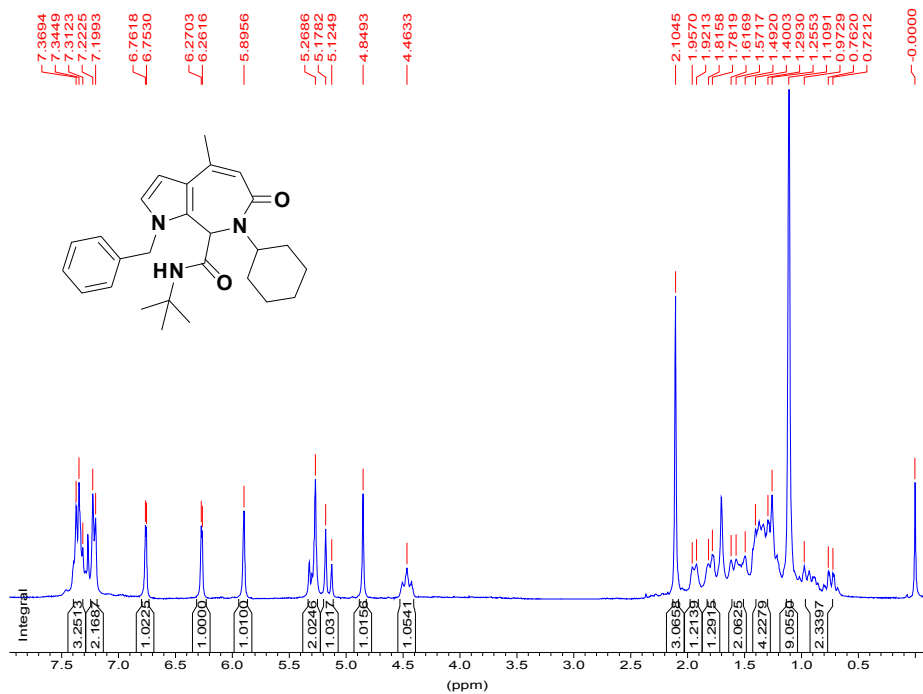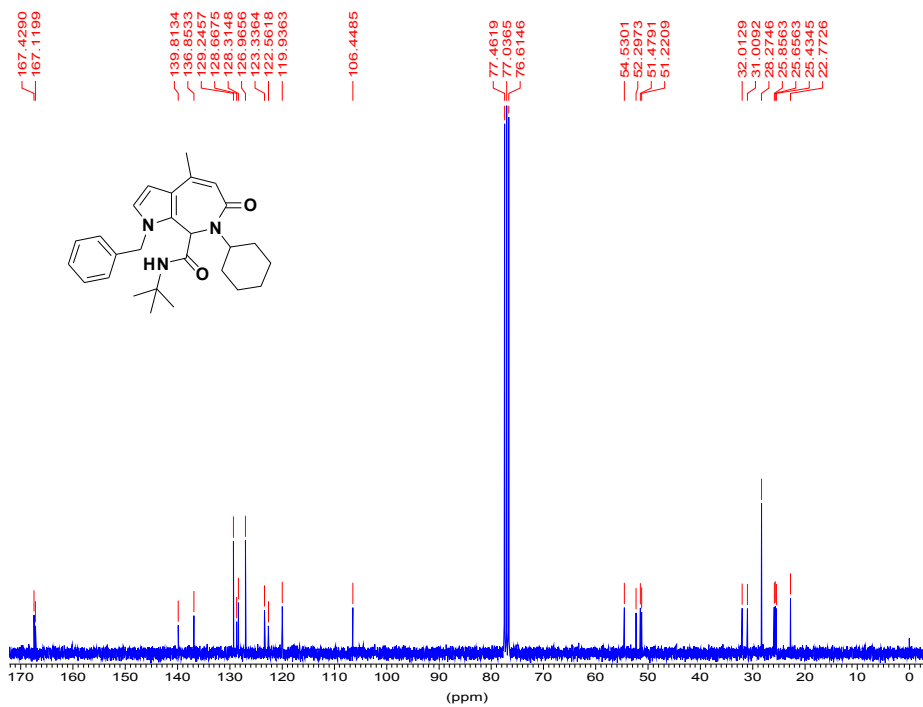



$^1\text{H}$  and  $^{13}\text{C}$  NMR spectra of compound **7h** (300 MHz,  $\text{CDCl}_3$ )

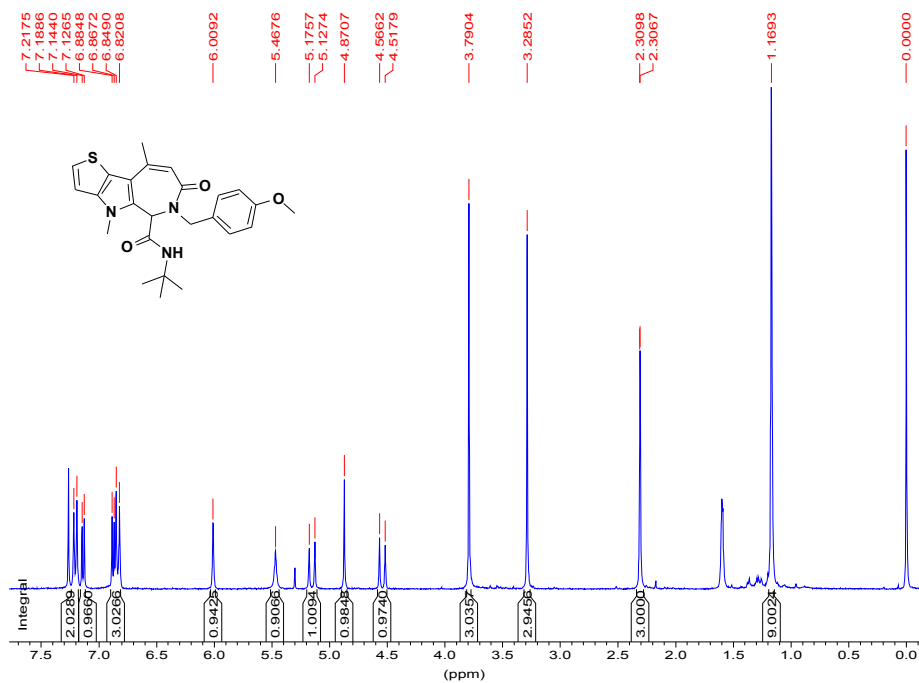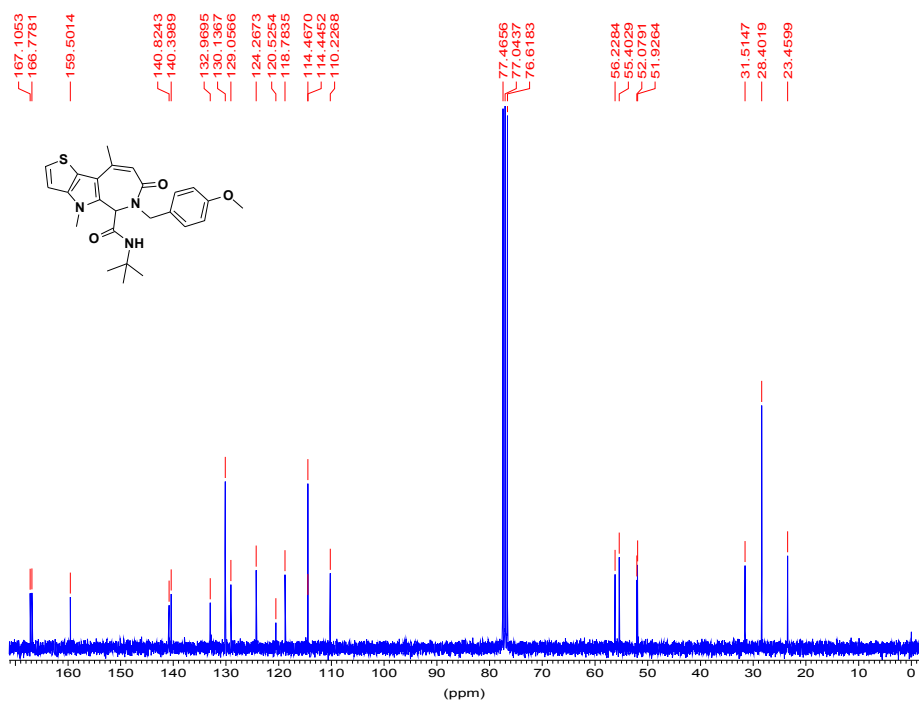

Supplement: c2cc35900f.pdf [file c2cc35900f.pdf]
